# Supplementary material for: Effect of genetically predicted sclerostin on cardiovascular biomarkers, risk factors, and disease outcomes
Source: Springer Nature journal article supplement (doi:10.1038/s41467-024-53623-5), 2024-11-13
Supplement: MOESM1 [file 41467_2024_53623_MOESM1_ESM.pdf]

## Supplementary Figures and Tables

**Supplementary Table 1.** Results from the fixed-effects and random effects meta-analysis of the instruments. Sun et al. used simple linear regression using an additive genetic model for the test statistic. Ferkingstad et al. used linear mixed model implemented in BOLT-LMM for the test statistic. Pietzner et al. used BGENIE to perform a linear association test. Note: EA = Effect allele, OA = Other allele, SE = Standard error.

| SNP        | EA | OA | Beta            |                          |                       | SE              |                          |                       | Effect |          | SE       |          | P-Value  | Random  | Heterogeneity  |             |           | Sample size |
|------------|----|----|-----------------|--------------------------|-----------------------|-----------------|--------------------------|-----------------------|--------|----------|----------|----------|----------|---------|----------------|-------------|-----------|-------------|
|            |    |    | Sun et al. 2018 | Ferkingstad et al., 2021 | Pietzner et al., 2021 | Sun et al. 2018 | Ferkingstad et al., 2021 | Pietzner et al., 2021 | Fixed  | Random   | Fixed    | Random   |          |         | I <sup>2</sup> | Q statistic | Q P-Value |             |
| rs7220711  | A  | G  | 0.0225          | 0.0323                   | 0.0661                | 0.0255          | 0.00863                  | 0.0125                | 0.042  | 0.04303  | 0.006842 | 0.013383 | 1.11E-09 | 0.00131 | 0.640486       | 5.563072    | 0.061943  | 49,372      |
| rs66838809 | A  | G  | -0.0833         | -0.0462                  | -0.12                 | 0.0485          | 0.0137                   | 0.0232                | -0.07  | -0.08054 | 0.011478 | 0.028263 | 7.76E-09 | 0.00439 | 0.737024       | 7.605257    | 0.022312  | 49,372      |

**Supplementary Table 2.** Linkage disequilibrium correlation matrix of the instruments. The matrix was calculated using 1000 genomes LD European reference panel. Notice that the values correspond to r, not r<sup>2</sup>.

| SNP              | rs7220711 (G-A) | rs66838809 (A-G) |
|------------------|-----------------|------------------|
| rs7220711 (G-A)  | 1               | 0.376            |
| rs66838809 (A-G) | 0.376           | 1                |

**Supplementary Table 3.** Results of the Mendelian randomisation of the positive control outcomes. MR estimates have been calculated using generalised inverse variance weighted method.

| Outcome                   | N instruments | Type of estimate                                  | MR estimate | Standard error | P value     | GWAS ID                                                                                                                                                                                                             |
|---------------------------|---------------|---------------------------------------------------|-------------|----------------|-------------|---------------------------------------------------------------------------------------------------------------------------------------------------------------------------------------------------------------------|
| Heel bone mineral density | 2             | Beta [SD change/SD decrease in sclerostin levels] | 1.00187062  | 0.04024844     | 9.05E-137   | <a href="https://ftp.ebi.ac.uk/pub/databases/gwas/summary_statistics/GCST006001-GCST007000/GCST006979/">https://ftp.ebi.ac.uk/pub/databases/gwas/summary_statistics/GCST006001-GCST007000/GCST006979/</a>           |
| Hip fracture              | 2             | OR / SD decrease in sclerostin levels             | 0.15877783  | 0.33005603     | 2.46725E-08 | <a href="http://ftp.ebi.ac.uk/pub/databases/gwas/summary_statistics/GCST90161001-GCST90162000/GCST90161240/">http://ftp.ebi.ac.uk/pub/databases/gwas/summary_statistics/GCST90161001-GCST90162000/GCST90161240/</a> |

**Supplementary Table 4.** Results of the Mendelian randomisation of the GWAS outcomes. MR estimates have been calculated using generalised inverse variance weighted method.

| Outcome                        | N<br>instrument<br>s | Type of estimate                                            | MR<br>estimate | Standard<br>error | P value    | GWAS ID                                                                                                                                                                                                                         |
|--------------------------------|----------------------|-------------------------------------------------------------|----------------|-------------------|------------|---------------------------------------------------------------------------------------------------------------------------------------------------------------------------------------------------------------------------------|
| LDL<br>cholesterol             | 2                    | Beta [mg/dL change/SD<br>decrease in sclerostin<br>levels]  | 0.01908919     | 0.03039105        | 0.52992621 | <a href="https://csg.sph.umich.edu/willer/public/glgc-lipids2021/">https://csg.sph.umich.edu/willer/public/glgc-lipids2021/</a>                                                                                                 |
| HDL<br>cholesterol             | 2                    | Beta [mg/dL change/SD<br>decrease in sclerostin<br>levels]  | -0.1455347     | 0.03013333        | 1.37E-06   | <a href="https://csg.sph.umich.edu/willer/public/glgc-lipids2021/">https://csg.sph.umich.edu/willer/public/glgc-lipids2021/</a>                                                                                                 |
| Fasting<br>glucose             | 2                    | Beta [mmol/L change/SD<br>decrease in sclerostin<br>levels] | 0.02641789     | 0.03965886        | 0.50532907 | <a href="https://magicinvestigators.org/downloads/">https://magicinvestigators.org/downloads/</a>                                                                                                                               |
| HbA1c                          | 2                    | Beta [% change/SD<br>decrease in sclerostin<br>levels]      | 0.02104062     | 0.02902738        | 0.46854154 | <a href="https://magicinvestigators.org/downloads/">https://magicinvestigators.org/downloads/</a>                                                                                                                               |
| Coronary<br>artery<br>disease  | 2                    | OR / SD decrease in<br>sclerostin levels                    | 1.24958769     | 0.10954944        | 0.04196071 | <a href="https://ftp.ebi.ac.uk/pub/databases/gwas/summary_statistics/GCST90132001-GCST90133000/GCST90132314/">https://ftp.ebi.ac.uk/pub/databases/gwas/summary_statistics/GCST90132001-GCST90133000/GCST90132314/</a>           |
| Myocardial<br>infarction       | 2                    | OR / SD decrease in<br>sclerostin levels                    | 1.35466428     | 0.16583496        | 0.06718173 | <a href="https://ftp.ebi.ac.uk/pub/databases/gwas/summary_statistics/GCST011001-GCST012000/GCST011365/harmonised/">https://ftp.ebi.ac.uk/pub/databases/gwas/summary_statistics/GCST011001-GCST012000/GCST011365/harmonised/</a> |
| Ischaemic<br>stroke            | 2                    | OR / SD decrease in<br>sclerostin levels                    | 1.18979215     | 0.15578975        | 0.2646495  | <a href="https://ftp.ebi.ac.uk/pub/databases/gwas/summary_statistics/GCST90104001-GCST90105000/GCST90104540/">https://ftp.ebi.ac.uk/pub/databases/gwas/summary_statistics/GCST90104001-GCST90105000/GCST90104540/</a>           |
| Hypertension                   | 2                    | OR / SD decrease in<br>sclerostin levels                    | 1.0264745      | 0.01958368        | 0.18211216 | ukb-b-14057                                                                                                                                                                                                                     |
| Type 2<br>diabetes<br>mellitus | 2                    | OR / SD decrease in<br>sclerostin levels                    | 1.44983479     | 0.1384198         | 0.00728558 | <a href="https://www.ebi.ac.uk/gwas/studies/GCST90132184">https://www.ebi.ac.uk/gwas/studies/GCST90132184</a>                                                                                                                   |

**Supplementary Table 5.** Study information of the UK Biobank cohorts.

| <b>Outcome</b>          | <b>Type of outcome</b> | <b>N</b> | <b>Age (SD)</b> | <b>Male (%)</b> | <b>Mean (SD) /Cases (%)</b> | <b>Mean followup</b> |
|-------------------------|------------------------|----------|-----------------|-----------------|-----------------------------|----------------------|
| Whole cohort            | -                      | 276,172  | 57 (8)          | 128,946 (47)    | -                           | -                    |
| Cholesterol             | Continuous             | 263,285  | 57 (8)          | 123,011 (47)    | 5.72 (1.14)                 | -                    |
| LDL cholesterol         | Continuous             | 262,794  | 57 (8)          | 122,752 (47)    | 3.57 (0.87)                 | -                    |
| HDL cholesterol         | Continuous             | 241,065  | 57 (8)          | 113,574 (47)    | 1.45 (0.38)                 | -                    |
| Triglycerides           | Continuous             | 263,067  | 57 (8)          | 122,877 (47)    | 1.75 (1.02)                 | -                    |
| Apolipoprotein-A        | Continuous             | 239,707  | 57 (8)          | 113,397 (47)    | 1.54 (0.27)                 | -                    |
| Apolipoprotein-B        | Continuous             | 261,986  | 57 (8)          | 122,208 (47)    | 1.03 (0.24)                 | -                    |
| C-Reactive protein      | Continuous             | 262,728  | 57 (8)          | 122,697 (47)    | 2.56 (4.35)                 | -                    |
| Lipoprotein (a)         | Continuous             | 209,333  | 57 (8)          | 974,06 (47)     | 44.07 (49.44)               | -                    |
| Glucose                 | Continuous             | 240,909  | 57 (8)          | 113,502 (47)    | 5.12 (1.21)                 | -                    |
| HbA1c                   | Continuous             | 263,079  | 57 (8)          | 122,845 (47)    | 35.92 (6.45)                | -                    |
| Coronary artery disease | Binary                 | 276,172  | 57 (8)          | 128,946 (47)    | 16,233 (6)                  | -                    |
| Myocardial infarction   | Binary                 | 276,172  | 57 (8)          | 128,946 (47)    | 10,861 (4)                  | -                    |
| Ischaemic stroke        | Binary                 | 276,172  | 57 (8)          | 128,946 (47)    | 3,830 (1)                   | -                    |
| Hypertension            | Binary                 | 276,172  | 57 (8)          | 128,946 (47)    | 98,040 (35)                 | -                    |
| Type 2 diabetes         | Binary                 | 276,172  | 57 (8)          | 128,946 (47)    | 21,664 (8)                  | -                    |
| Coronary artery disease | Survival               | 276,172  | 57 (8)          | 128,946 (47)    | 16,233 (6)                  | 68 (8)               |
| Myocardial infarction   | Survival               | 276,065  | 57 (8)          | 128,876 (47)    | 10,754 (4)                  | 68 (8)               |
| Ischaemic stroke        | Survival               | 276,172  | 57 (8)          | 128,946 (47)    | 3,830 (1)                   | 68 (8)               |
| Hypertension            | Survival               | 271,359  | 57 (8)          | 127,354 (47)    | 93,227 (34)                 | 63 (11)              |
| Type 2 diabetes         | Survival               | 266,268  | 57 (8)          | 122,592 (46)    | 11,760 (4)                  | 68 (8)               |

**Supplementary Table 6.** Results of the Mendelian randomisation for UK Biobank outcomes.

| Outcome                 | Instruments | Type of estimate                                  | MR estimate | Standard error | P value    |
|-------------------------|-------------|---------------------------------------------------|-------------|----------------|------------|
| Cholesterol             | 2           | Beta [SD change/SD decrease in sclerostin levels] | 0.04351909  | 0.06003166     | 0.46849154 |
| LDL cholesterol         | 2           | Beta [SD change/SD decrease in sclerostin levels] | 0.06030358  | 0.06081673     | 0.32141108 |
| HDL cholesterol         | 2           | Beta [SD change/SD decrease in sclerostin levels] | -0.1307288  | 0.05793801     | 0.02404829 |
| Apolipoprotein-A        | 2           | Beta [SD change/SD decrease in sclerostin levels] | -0.0782697  | 0.05897189     | 0.18443007 |
| Apolipoprotein-B        | 2           | Beta [SD change/SD decrease in sclerostin levels] | 0.11891979  | 0.06111597     | 0.05167812 |
| Lipoprotein (a)         | 2           | Beta [SD change/SD decrease in sclerostin levels] | -0.0356529  | 0.06837771     | 0.60208033 |
| C-Reactive protein      | 2           | Beta [SD change/SD decrease in sclerostin levels] | 0.01955029  | 0.06100932     | 0.7486291  |
| Triglycerides           | 2           | Beta [SD change/SD decrease in sclerostin levels] | 0.26206403  | 0.05966256     | 1.12E-05   |
| HbA1c                   | 2           | Beta [SD change/SD decrease in sclerostin levels] | -0.0045441  | 0.06088411     | 0.94050497 |
| Glucose                 | 2           | Beta [SD change/SD decrease in sclerostin levels] | 0.08939238  | 0.06360014     | 0.15986151 |
| Coronary artery disease | 2           | OR / SD decrease in sclerostin levels             | 1.84897728  | 0.2572956      | 1.69E-02   |
| Myocardial infarction   | 2           | OR / SD decrease in sclerostin levels             | 1.37578563  | 0.31152161     | 0.30579464 |
| Ischaemic stroke        | 2           | OR / SD decrease in sclerostin levels             | 1.28494794  | 0.50747985     | 0.62127395 |
| Hypertension            | 2           | OR / SD decrease in sclerostin levels             | 1.18101945  | 0.13033265     | 0.20175612 |
| Type 2 diabetes         | 2           | OR / SD decrease in sclerostin levels             | 1.62002558  | 0.22238731     | 3.01E-02   |
| Coronary artery disease | 2           | HR / SD decrease in sclerostin levels             | 1.770027    | 0.2437155      | 0.01913579 |
| Myocardial infarction   | 2           | HR / SD decrease in sclerostin levels             | 1.369607    | 0.30190278     | 0.29750167 |
| Ischaemic stroke        | 2           | HR / SD decrease in sclerostin levels             | 1.285523    | 0.50198067     | 0.6168292  |
| Hypertension            | 2           | HR / SD decrease in sclerostin levels             | 1.120222    | 0.10221314     | 0.26670209 |
| Type 2 diabetes         | 2           | HR / SD decrease in sclerostin levels             | 1.668812    | 0.28629863     | 0.07365778 |

**Supplementary Table 7.** Study information of the cohorts used for the GWAS meta-analysis of sclerostin.

| Article reference        | Study           | Outcome    | N      | Age (SD) | % Female | Study population   |
|--------------------------|-----------------|------------|--------|----------|----------|--------------------|
| Sun et al., 2018         | INTERVAL study  | Sclerostin | 3,301  | 43 (14)  | 49       | European (England) |
| Ferkingstad et al., 2021 | deCODE genetics | Sclerostin | 35,559 | 55 (17)  | 57       | European (Iceland) |
| Pietzner et al., 2021    | Fenland study   | Sclerostin | 10,708 | 49 (7)   | 53       | European (England) |

**Supplementary Table 8.** Study information of the cohorts used in the published GWAS summary statistic of the outcomes. Note: LDL cholesterol, HDL cholesterol, and HbA1c mean and standard values were not reported by the original publication and were estimated as weighted (by the sample sizes) average of the means reported in the contributing studies. Glucose mean value could not be estimated.

| Article reference             | Study         | Outcome                   | N         | Mean (SD)                        | Study population |
|-------------------------------|---------------|---------------------------|-----------|----------------------------------|------------------|
|                               |               |                           |           | N cases (%)                      |                  |
| <b>Morris et al., 2019</b>    | UK Biobank    | Heel bone mineral density | 426,824   | 0.54 (0.12) [g/cm <sup>2</sup> ] | European         |
| <b>Nethander et al., 2022</b> | Meta-analysis | Hip fracture              | 735,354   | 11,516 (2)                       | European         |
| <b>Aragam et al., 2022</b>    | Meta-analysis | Coronary artery disease   | 1,165,690 | 181,522 (16)                     | European         |
| <b>Hartiala et al., 2021</b>  | Meta-analysis | Myocardial infarction     | ~639,000  | ~62,000 (10)                     | European         |
| <b>Mishra et al., 2022</b>    | Meta-analysis | Ischaemic stroke          | 1,847,683 | 612,875 (33)                     | European         |
| <b>Elsworth et al., 2018</b>  | UK Biobank    | Hypertension              | 462,933   | 119,731 (26)                     | European         |
| <b>Mahajan et al., 2022</b>   | Meta-analysis | Type II diabetes mellitus | 933,970   | 80,154 (9)                       | European         |
| <b>Graham et al., 2021</b>    | Meta-analysis | LDL-Cholesterol           | 1,228,508 | 131 [mg/dL]                      | European         |
| <b>Graham et al., 2021</b>    | Meta-analysis | HDL-Cholesterol           | 1,244,439 | 51.9 [mg/dL]                     | European         |
| <b>Chen et al., 2021</b>      | Meta-analysis | Fasting glucose           | 178,455   | -                                | European         |
| <b>Chen et al., 2021</b>      | Meta-analysis | HbA1c                     | 132,400   | 5.23 [mmol/l]                    | European         |



**Supplementary Table 9.** Sensitivity analyses results. Note: gIVW = generalised inverse variance weighted method, OR = Odds ratio, SD = Standard deviation, MR = Mendelian randomisation,.

| Sensitivity analysis | Outcome                   | Source of outcome data | r <sup>2</sup> threshold | N instruments | N outcome | Type of MR estimate (units)                            | MR method  | MR estimate | S.E of the MR estimate | P-Value of the MR estimate |
|----------------------|---------------------------|------------------------|--------------------------|---------------|-----------|--------------------------------------------------------|------------|-------------|------------------------|----------------------------|
| Step-wise pruning    | Heel bone mineral density | GWAS                   | r <sup>2</sup> ≤ 0.001   | 1             | 426,824   | Beta [SD change/SD decrease in sclerostin levels]      | Wald ratio | 0.932381    | 0.04582019             | 4.77E-92                   |
|                      |                           |                        | r <sup>2</sup> ≤ 0.1     | 1             | 426,824   | Beta [SD change/SD decrease in sclerostin levels]      | gIVW       | 0.932381    | 0.04582019             | 4.77E-92                   |
|                      |                           |                        | r <sup>2</sup> ≤ 0.5     | 2             | 426,824   | Beta [SD change/SD decrease in sclerostin levels]      | gIVW       | 1.00187063  | 0.04024844             | 9.05E-137                  |
|                      |                           |                        | r <sup>2</sup> ≤ 0.8     | 6             | 426,824   | Beta [SD change/SD decrease in sclerostin levels]      | gIVW       | 0.53032519  | 0.19761409             | 0.00728254                 |
| Step-wise pruning    | Hip fracture              | GWAS                   | r <sup>2</sup> ≤ 0.001   | 1             | 735,354   | OR / SD decrease in sclerostin levels                  | Wald ratio | 0.18412271  | 0.35952255             | 2.52E-06                   |
|                      |                           |                        | r <sup>2</sup> ≤ 0.1     | 1             | 735,354   | OR / SD decrease in sclerostin levels                  | gIVW       | 0.18412271  | 0.35952255             | 2.52E-06                   |
|                      |                           |                        | r <sup>2</sup> ≤ 0.5     | 2             | 735,354   | OR / SD decrease in sclerostin levels                  | gIVW       | 0.15877783  | 0.330056               | 2.47E-08                   |
|                      |                           |                        | r <sup>2</sup> ≤ 0.8     | 6             | 735,354   | OR / SD decrease in sclerostin levels                  | gIVW       | 0.37250533  | 0.39046181             | 0.01143663                 |
| Step-wise pruning    | LDL cholesterol           | GWAS                   | r <sup>2</sup> ≤ 0.001   | 1             | 1,228,508 | Beta [mg/dL change/SD decrease in sclerostin levels]   | Wald ratio | 0.02570922  | 0.0342136              | 0.45239234                 |
|                      |                           |                        | r <sup>2</sup> ≤ 0.1     | 1             | 1,228,508 | Beta [mg/dL change/SD decrease in sclerostin levels]   | gIVW       | 0.02570922  | 0.0342136              | 0.45239234                 |
|                      |                           |                        | r <sup>2</sup> ≤ 0.5     | 2             | 1,228,508 | Beta [mg/dL change/SD decrease in sclerostin levels]   | gIVW       | 0.01908919  | 0.03039105             | 0.52992621                 |
|                      |                           |                        | r <sup>2</sup> ≤ 0.8     | 6             | 1,228,508 | Beta [mg/dL change/SD decrease in sclerostin levels]   | gIVW       | -0.02232495 | 0.02297269             | 0.33114821                 |
| Step-wise pruning    | HDL cholesterol           | GWAS                   | r <sup>2</sup> ≤ 0.001   | 1             | 1,244,439 | Beta [mg/dL change/SD decrease in sclerostin levels]   | Wald ratio | -0.166144   | 0.0339128              | 9.63E-07                   |
|                      |                           |                        | r <sup>2</sup> ≤ 0.1     | 1             | 1,244,439 | Beta [mg/dL change/SD decrease in sclerostin levels]   | gIVW       | -0.166144   | 0.0339128              | 9.63E-07                   |
|                      |                           |                        | r <sup>2</sup> ≤ 0.5     | 2             | 1,244,439 | Beta [mg/dL change/SD decrease in sclerostin levels]   | gIVW       | -0.14553469 | 0.03013333             | 1.37E-06                   |
|                      |                           |                        | r <sup>2</sup> ≤ 0.8     | 6             | 1,244,439 | Beta [mg/dL change/SD decrease in sclerostin levels]   | gIVW       | -0.15377985 | 0.08674871             | 0.07627765                 |
| Step-wise pruning    | Fasting glucose           | GWAS                   | r <sup>2</sup> ≤ 0.001   | 1             | 178,455   | Beta [mmol/dL change/SD decrease in sclerostin levels] | Wald ratio | 0           | 0.04314271             | 1                          |
|                      |                           |                        | r <sup>2</sup> ≤ 0.1     | 1             | 178,455   | Beta [mmol/dL change/SD decrease in sclerostin levels] | gIVW       | 0           | 0.04314271             | 1                          |
|                      |                           |                        | r <sup>2</sup> ≤ 0.5     | 2             | 178,455   | Beta [mmol/dL change/SD decrease in sclerostin levels] | gIVW       | 0.02641789  | 0.03965886             | 0.50532907                 |
|                      |                           |                        | r <sup>2</sup> ≤ 0.8     | 6             | 178,455   | Beta [mmol/dL change/SD decrease in sclerostin levels] | gIVW       | 0.04282551  | 0.03192605             | 0.17979161                 |

|                   |                         |            |                  |   |           |                                                   |            |                 |            |            |
|-------------------|-------------------------|------------|------------------|---|-----------|---------------------------------------------------|------------|-----------------|------------|------------|
| Step-wise pruning | HbA1c                   | GWAS       | $r^2 \leq 0.001$ | 1 | 132,400   | Beta [% change/SD decrease in sclerostin levels]  | Wald ratio | 0.02157135      | 0.03115862 | 0.48874412 |
|                   |                         |            | $r^2 \leq 0.1$   | 1 | 132,400   | Beta [% change/SD decrease in sclerostin levels]  | gIVW       | 0.02157135      | 0.03115862 | 0.48874412 |
|                   |                         |            | $r^2 \leq 0.5$   | 2 | 132,400   | Beta [% change/SD decrease in sclerostin levels]  | gIVW       | 0.02104062      | 0.02902738 | 0.46854154 |
|                   |                         |            | $r^2 \leq 0.8$   | 6 | 132,400   | Beta [% change/SD decrease in sclerostin levels]  | gIVW       | 0.00092934      | 0.02037851 | 0.96362612 |
| Step-wise pruning | Coronary artery disease | GWAS       | $r^2 \leq 0.001$ | 1 | 1,165,690 | OR / SD decrease in sclerostin levels             | Wald ratio | 1.30240886      | 0.12446919 | 0.03377579 |
|                   |                         |            | $r^2 \leq 0.1$   | 1 | 1,165,690 | OR / SD decrease in sclerostin levels             | gIVW       | 1.30240886      | 0.12446919 | 0.03377579 |
|                   |                         |            | $r^2 \leq 0.5$   | 2 | 1,165,690 | OR / SD decrease in sclerostin levels             | gIVW       | 1.24958769      | 0.10954944 | 0.04196071 |
|                   |                         |            | $r^2 \leq 0.8$   | 6 | 1,165,690 | OR / SD decrease in sclerostin levels             | gIVW       | 1.05645197      | 0.09736719 | 0.57274715 |
| Step-wise pruning | Myocardial infarction   | GWAS       | $r^2 \leq 0.001$ | 1 | ~639,000  | OR / SD decrease in sclerostin levels             | Wald ratio | 1.28167323      | 0.18251762 | 0.17392968 |
|                   |                         |            | $r^2 \leq 0.1$   | 1 | ~639,000  | OR / SD decrease in sclerostin levels             | gIVW       | 1.28167323      | 0.18251762 | 0.17392968 |
|                   |                         |            | $r^2 \leq 0.5$   | 2 | ~639,000  | OR / SD decrease in sclerostin levels             | gIVW       | 1.35466428      | 0.16583496 | 0.06718173 |
|                   |                         |            | $r^2 \leq 0.8$   | 6 | ~639,000  | OR / SD decrease in sclerostin levels             | gIVW       | 1.21611639      | 0.10627912 | 0.06561792 |
| Step-wise pruning | Ischaemic stroke        | GWAS       | $r^2 \leq 0.001$ | 1 | 1,847,683 | OR / SD decrease in sclerostin levels             | Wald ratio | 1.32369569      | 0.17017401 | 0.0993758  |
|                   |                         |            | $r^2 \leq 0.1$   | 1 | 1,847,683 | OR / SD decrease in sclerostin levels             | gIVW       | 1.32369569      | 0.17017401 | 0.0993758  |
|                   |                         |            | $r^2 \leq 0.5$   | 2 | 1,847,683 | OR / SD decrease in sclerostin levels             | gIVW       | 1.18979215      | 0.15578975 | 0.2646495  |
|                   |                         |            | $r^2 \leq 0.8$   | 6 | 1,847,683 | OR / SD decrease in sclerostin levels             | gIVW       | 1.24937878      | 0.18716618 | 0.23421717 |
| Step-wise pruning | Hypertension            | GWAS       | $r^2 \leq 0.001$ | 1 | 462,933   | OR / SD decrease in sclerostin levels             | Wald ratio | 1.01383256      | 0.02224019 | 0.53677305 |
|                   |                         |            | $r^2 \leq 0.1$   | 1 | 462,933   | OR / SD decrease in sclerostin levels             | gIVW       | 1.01383256      | 0.02224019 | 0.53677305 |
|                   |                         |            | $r^2 \leq 0.5$   | 2 | 462,933   | OR / SD decrease in sclerostin levels             | gIVW       | 1.0264745       | 0.01958368 | 0.18211216 |
|                   |                         |            | $r^2 \leq 0.8$   | 6 | 462,933   | OR / SD decrease in sclerostin levels             | gIVW       | 1.00711378      | 0.0124633  | 0.56952081 |
| Step-wise pruning | Type 2 diabetes         | GWAS       | $r^2 \leq 0.001$ | 1 | 933,970   | OR / SD decrease in sclerostin levels             | Wald ratio | 1.56549925      | 0.15818992 | 0.00460653 |
|                   |                         |            | $r^2 \leq 0.1$   | 1 | 933,970   | OR / SD decrease in sclerostin levels             | gIVW       | 1.56549925      | 0.15818992 | 0.00460653 |
|                   |                         |            | $r^2 \leq 0.5$   | 2 | 933,970   | OR / SD decrease in sclerostin levels             | gIVW       | 1.44983479      | 0.1384198  | 0.00728559 |
|                   |                         |            | $r^2 \leq 0.8$   | 6 | 933,970   | OR / SD decrease in sclerostin levels             | gIVW       | 1.18970371      | 0.10298299 | 0.09165567 |
| Step-wise pruning | Cholesterol             | UK Biobank | $r^2 \leq 0.001$ | 1 | 263,285   | Beta [SD change/SD decrease in sclerostin levels] | Wald ratio | 0.04102183      | 0.06778907 | 0.54508646 |
|                   |                         |            | $r^2 \leq 0.1$   | 1 | 263,285   | Beta [SD change/SD decrease in sclerostin levels] | gIVW       | 0.04102183      | 0.06778907 | 0.54508646 |
|                   |                         |            | $r^2 \leq 0.5$   | 2 | 263,285   | Beta [SD change/SD decrease in sclerostin levels] | gIVW       | 0.04556569      | 0.05993822 | 0.4471285  |
|                   |                         |            | $r^2 \leq 0.8$   | 6 | 263,285   | Beta [SD change/SD decrease in sclerostin levels] | gIVW       | -<br>0.01860144 | 0.03810697 | 0.62545248 |
| Step-wise pruning | LDL cholesterol         | UK Biobank | $r^2 \leq 0.001$ | 1 | 262,794   | Beta [SD change/SD decrease in sclerostin levels] | Wald ratio | 0.05613282      | 0.06873121 | 0.41409954 |

|                   |                    |            |                  |   |         |                                                   |            |             |            |            |
|-------------------|--------------------|------------|------------------|---|---------|---------------------------------------------------|------------|-------------|------------|------------|
|                   |                    |            | $r^2 \leq 0.1$   | 1 | 262,794 | Beta [SD change/SD decrease in sclerostin levels] | gIVW       | 0.05613282  | 0.06873121 | 0.41409954 |
|                   |                    |            | $r^2 \leq 0.5$   | 2 | 262,794 | Beta [SD change/SD decrease in sclerostin levels] | gIVW       | 0.06152508  | 0.06077499 | 0.31137453 |
|                   |                    |            | $r^2 \leq 0.8$   | 6 | 262,794 | Beta [SD change/SD decrease in sclerostin levels] | gIVW       | -0.0089142  | 0.03863295 | 0.81751619 |
| Step-wise pruning | HDL cholesterol    | UK Biobank | $r^2 \leq 0.001$ | 1 | 241,065 | Beta [SD change/SD decrease in sclerostin levels] | Wald ratio | -0.14513568 | 0.06545376 | 0.02659731 |
|                   |                    |            | $r^2 \leq 0.1$   | 1 | 241,065 | Beta [SD change/SD decrease in sclerostin levels] | gIVW       | -0.14513568 | 0.06545376 | 0.02659731 |
|                   |                    |            | $r^2 \leq 0.5$   | 2 | 241,065 | Beta [SD change/SD decrease in sclerostin levels] | gIVW       | -0.12915149 | 0.05785454 | 0.02559196 |
|                   |                    |            | $r^2 \leq 0.8$   | 6 | 241,065 | Beta [SD change/SD decrease in sclerostin levels] | gIVW       | -0.14913587 | 0.0863536  | 0.08416102 |
| Step-wise pruning | Triglycerides      | UK Biobank | $r^2 \leq 0.001$ | 1 | 263,067 | Beta [SD change/SD decrease in sclerostin levels] | Wald ratio | 0.2810236   | 0.06733437 | 3.00E-05   |
|                   |                    |            | $r^2 \leq 0.1$   | 1 | 263,067 | Beta [SD change/SD decrease in sclerostin levels] | gIVW       | 0.2810236   | 0.06733437 | 3.00E-05   |
|                   |                    |            | $r^2 \leq 0.5$   | 2 | 263,067 | Beta [SD change/SD decrease in sclerostin levels] | gIVW       | 0.26412892  | 0.05955772 | 9.21E-06   |
|                   |                    |            | $r^2 \leq 0.8$   | 6 | 263,067 | Beta [SD change/SD decrease in sclerostin levels] | gIVW       | 0.20606198  | 0.0788878  | 0.00899907 |
| Step-wise pruning | Apolipoprotein-A   | UK Biobank | $r^2 \leq 0.001$ | 1 | 239,707 | Beta [SD change/SD decrease in sclerostin levels] | Wald ratio | -0.08536802 | 0.06636566 | 0.19832857 |
|                   |                    |            | $r^2 \leq 0.1$   | 1 | 239,707 | Beta [SD change/SD decrease in sclerostin levels] | gIVW       | -0.08536802 | 0.06636566 | 0.19832857 |
|                   |                    |            | $r^2 \leq 0.5$   | 2 | 239,707 | Beta [SD change/SD decrease in sclerostin levels] | gIVW       | -0.07523629 | 0.05865662 | 0.19961243 |
|                   |                    |            | $r^2 \leq 0.8$   | 6 | 239,707 | Beta [SD change/SD decrease in sclerostin levels] | gIVW       | -0.12005459 | 0.07950615 | 0.13104246 |
| Step-wise pruning | Apolipoprotein-B   | UK Biobank | $r^2 \leq 0.001$ | 1 | 261,986 | Beta [SD change/SD decrease in sclerostin levels] | Wald ratio | 0.10292112  | 0.06903513 | 0.13600051 |
|                   |                    |            | $r^2 \leq 0.1$   | 1 | 261,986 | Beta [SD change/SD decrease in sclerostin levels] | gIVW       | 0.10292112  | 0.06903513 | 0.13600051 |
|                   |                    |            | $r^2 \leq 0.5$   | 2 | 261,986 | Beta [SD change/SD decrease in sclerostin levels] | gIVW       | 0.12061292  | 0.06103368 | 0.04813554 |
|                   |                    |            | $r^2 \leq 0.8$   | 6 | 261,986 | Beta [SD change/SD decrease in sclerostin levels] | gIVW       | 0.04324013  | 0.03880648 | 0.26517177 |
| Step-wise pruning | C-Reactive protein | UK Biobank | $r^2 \leq 0.001$ | 1 | 262,728 | Beta [SD change/SD decrease in sclerostin levels] | Wald ratio | 2.95E-05    | 0.06887731 | 0.99965865 |
|                   |                    |            | $r^2 \leq 0.1$   | 1 | 262,728 | Beta [SD change/SD decrease in sclerostin levels] | gIVW       | 2.95E-05    | 0.06887731 | 0.99965865 |
|                   |                    |            | $r^2 \leq 0.5$   | 2 | 262,728 | Beta [SD change/SD decrease in sclerostin levels] | gIVW       | 0.02183399  | 0.06090094 | 0.71995686 |
|                   |                    |            | $r^2 \leq 0.8$   | 6 | 262,728 | Beta [SD change/SD decrease in sclerostin levels] | gIVW       | 0.07297988  | 0.03880145 | 0.05999173 |
| Step-wise pruning | Lipoprotein (a)    | UK Biobank | $r^2 \leq 0.001$ | 1 | 209,333 | Beta [SD change/SD decrease in sclerostin levels] | Wald ratio | -0.01551003 | 0.07731104 | 0.84099688 |

|                   |                         |                          |                  |   |         |                                                   |            |             |            |            |
|-------------------|-------------------------|--------------------------|------------------|---|---------|---------------------------------------------------|------------|-------------|------------|------------|
|                   |                         |                          | $r^2 \leq 0.1$   | 1 | 209,333 | Beta [SD change/SD decrease in sclerostin levels] | gIVW       | -0.01551003 | 0.07731104 | 0.84099688 |
|                   |                         |                          | $r^2 \leq 0.5$   | 2 | 209,333 | Beta [SD change/SD decrease in sclerostin levels] | gIVW       | -0.03528168 | 0.06837289 | 0.60584144 |
|                   |                         |                          | $r^2 \leq 0.8$   | 6 | 209,333 | Beta [SD change/SD decrease in sclerostin levels] | gIVW       | 0.02018616  | 0.05290314 | 0.70278158 |
| Step-wise pruning | Glucose                 | UK Biobank               | $r^2 \leq 0.001$ | 1 | 240,909 | Beta [SD change/SD decrease in sclerostin levels] | Wald ratio | 0.07511635  | 0.07157228 | 0.29394009 |
|                   |                         |                          | $r^2 \leq 0.1$   | 1 | 240,909 | Beta [SD change/SD decrease in sclerostin levels] | gIVW       | 0.07511635  | 0.07157228 | 0.29394009 |
|                   |                         |                          | $r^2 \leq 0.5$   | 2 | 240,909 | Beta [SD change/SD decrease in sclerostin levels] | gIVW       | 0.09284299  | 0.06323605 | 0.14205071 |
|                   |                         |                          | $r^2 \leq 0.8$   | 6 | 240,909 | Beta [SD change/SD decrease in sclerostin levels] | gIVW       | 0.05817519  | 0.04019481 | 0.14780427 |
| Step-wise pruning | HbA1c                   | UK Biobank               | $r^2 \leq 0.001$ | 1 | 263,079 | Beta [SD change/SD decrease in sclerostin levels] | Wald ratio | -0.02147077 | 0.06735942 | 0.74991662 |
|                   |                         |                          | $r^2 \leq 0.1$   | 1 | 263,079 | Beta [SD change/SD decrease in sclerostin levels] | gIVW       | -0.02147077 | 0.06735942 | 0.74991662 |
|                   |                         |                          | $r^2 \leq 0.5$   | 2 | 263,079 | Beta [SD change/SD decrease in sclerostin levels] | gIVW       | 0.00511291  | 0.05955887 | 0.93158865 |
|                   |                         |                          | $r^2 \leq 0.8$   | 6 | 263,079 | Beta [SD change/SD decrease in sclerostin levels] | gIVW       | -0.00676307 | 0.03773946 | 0.85777749 |
| Step-wise pruning | Coronary artery disease | UK Biobank (categorical) | $r^2 \leq 0.001$ | 1 | 276,172 | OR / SD decrease in sclerostin levels             | Wald ratio | 1.90037182  | 0.29201352 | 0.0278994  |
|                   |                         |                          | $r^2 \leq 0.1$   | 1 | 276,172 | OR / SD decrease in sclerostin levels             | gIVW       | 1.90037182  | 0.29201352 | 0.0278994  |
|                   |                         |                          | $r^2 \leq 0.5$   | 2 | 276,172 | OR / SD decrease in sclerostin levels             | gIVW       | 1.84897728  | 0.2572956  | 0.01690262 |
|                   |                         |                          | $r^2 \leq 0.8$   | 6 | 276,172 | OR / SD decrease in sclerostin levels             | gIVW       | 1.18382334  | 0.2135353  | 0.42937344 |
| Step-wise pruning | Myocardial infarction   | UK Biobank (categorical) | $r^2 \leq 0.001$ | 1 | 276,065 | OR / SD decrease in sclerostin levels             | Wald ratio | 1.94938433  | 0.35089193 | 0.05712752 |
|                   |                         |                          | $r^2 \leq 0.1$   | 1 | 276,065 | OR / SD decrease in sclerostin levels             | gIVW       | 1.94938433  | 0.35089193 | 0.05712752 |
|                   |                         |                          | $r^2 \leq 0.5$   | 2 | 276,065 | OR / SD decrease in sclerostin levels             | gIVW       | 1.37578563  | 0.31152161 | 0.30579464 |
|                   |                         |                          | $r^2 \leq 0.8$   | 6 | 276,065 | OR / SD decrease in sclerostin levels             | gIVW       | 1.05222933  | 0.27652222 | 0.85392552 |
| Step-wise pruning | Ischaemic stroke        | UK Biobank (categorical) | $r^2 \leq 0.001$ | 1 | 276,172 | OR / SD decrease in sclerostin levels             | Wald ratio | 1.06633701  | 0.57773916 | 0.91147858 |
|                   |                         |                          | $r^2 \leq 0.1$   | 1 | 276,172 | OR / SD decrease in sclerostin levels             | gIVW       | 1.06633701  | 0.57773916 | 0.91147858 |
|                   |                         |                          | $r^2 \leq 0.5$   | 2 | 276,172 | OR / SD decrease in sclerostin levels             | gIVW       | 1.28494794  | 0.50747985 | 0.62127395 |
|                   |                         |                          | $r^2 \leq 0.8$   | 6 | 276,172 | OR / SD decrease in sclerostin levels             | gIVW       | 0.76487017  | 0.4980223  | 0.59042017 |
| Step-wise pruning | Hypertension            | UK Biobank (categorical) | $r^2 \leq 0.001$ | 1 | 271,359 | OR / SD decrease in sclerostin levels             | Wald ratio | 1.10875316  | 0.14752171 | 0.48405046 |
|                   |                         |                          | $r^2 \leq 0.1$   | 1 | 271,359 | OR / SD decrease in sclerostin levels             | gIVW       | 1.10875316  | 0.14752171 | 0.48405046 |
|                   |                         |                          | $r^2 \leq 0.5$   | 2 | 271,359 | OR / SD decrease in sclerostin levels             | gIVW       | 1.18101945  | 0.13033265 | 0.20175612 |
|                   |                         |                          | $r^2 \leq 0.8$   | 6 | 271,359 | OR / SD decrease in sclerostin levels             | gIVW       | 1.05420031  | 0.08289579 | 0.52429883 |
|                   |                         |                          | $r^2 \leq 0.001$ | 1 | 266,268 | OR / SD decrease in sclerostin levels             | Wald ratio | 1.53819406  | 0.25258953 | 0.08823586 |

|                       |                           |                          |                  |   |           |                                                      |            |             |            |            |
|-----------------------|---------------------------|--------------------------|------------------|---|-----------|------------------------------------------------------|------------|-------------|------------|------------|
| Step-wise pruning     | Type 2 diabetes           | UK Biobank (categorical) | $r^2 \leq 0.1$   | 1 | 266,268   | OR / SD decrease in sclerostin levels                | gIVW       | 1.53819406  | 0.25258953 | 0.08823586 |
|                       |                           |                          | $r^2 \leq 0.5$   | 2 | 266,268   | OR / SD decrease in sclerostin levels                | gIVW       | 1.62002558  | 0.22238731 | 0.03005406 |
|                       |                           |                          | $r^2 \leq 0.8$   | 6 | 266,268   | OR / SD decrease in sclerostin levels                | gIVW       | 1.45213146  | 0.14176496 | 0.00850478 |
| Step-wise pruning     | Coronary artery disease   | UK Biobank (survival)    | $r^2 \leq 0.001$ | 1 | 276,172   | HR / SD decrease in sclerostin levels                | Wald ratio | 1.81289761  | 0.27670977 | 0.03155508 |
|                       |                           |                          | $r^2 \leq 0.1$   | 1 | 276,172   | HR / SD decrease in sclerostin levels                | gIVW       | 1.81289761  | 0.27670977 | 0.03155508 |
|                       |                           |                          | $r^2 \leq 0.5$   | 2 | 276,172   | HR / SD decrease in sclerostin levels                | gIVW       | 1.7700273   | 0.2437155  | 0.01913579 |
|                       |                           |                          | $r^2 \leq 0.8$   | 6 | 276,172   | HR / SD decrease in sclerostin levels                | gIVW       | 1.16853246  | 0.20485376 | 0.44708013 |
| Step-wise pruning     | Myocardial infarction     | UK Biobank (survival)    | $r^2 \leq 0.001$ | 1 | 276,172   | HR / SD decrease in sclerostin levels                | Wald ratio | 1.91498016  | 0.33999829 | 0.05601572 |
|                       |                           |                          | $r^2 \leq 0.1$   | 1 | 276,172   | HR / SD decrease in sclerostin levels                | gIVW       | 1.91498016  | 0.33999829 | 0.05601572 |
|                       |                           |                          | $r^2 \leq 0.5$   | 2 | 276,172   | HR / SD decrease in sclerostin levels                | gIVW       | 1.36960736  | 0.30190278 | 0.29750167 |
|                       |                           |                          | $r^2 \leq 0.8$   | 6 | 276,172   | HR / SD decrease in sclerostin levels                | gIVW       | 1.04821662  | 0.27170394 | 0.86240413 |
| Step-wise pruning     | Ischaemic stroke          | UK Biobank (survival)    | $r^2 \leq 0.001$ | 1 | 276,172   | HR / SD decrease in sclerostin levels                | Wald ratio | 1.05794812  | 0.57161586 | 0.92149758 |
|                       |                           |                          | $r^2 \leq 0.1$   | 1 | 276,172   | HR / SD decrease in sclerostin levels                | gIVW       | 1.05794812  | 0.57161586 | 0.92149758 |
|                       |                           |                          | $r^2 \leq 0.5$   | 2 | 276,172   | HR / SD decrease in sclerostin levels                | gIVW       | 1.285523    | 0.50198067 | 0.6168292  |
|                       |                           |                          | $r^2 \leq 0.8$   | 6 | 276,172   | HR / SD decrease in sclerostin levels                | gIVW       | 0.77599628  | 0.49390784 | 0.6076216  |
| Step-wise pruning     | Hypertension              | UK Biobank (survival)    | $r^2 \leq 0.001$ | 1 | 276,172   | HR / SD decrease in sclerostin levels                | Wald ratio | 1.07213831  | 0.11585293 | 0.5476821  |
|                       |                           |                          | $r^2 \leq 0.1$   | 1 | 276,172   | HR / SD decrease in sclerostin levels                | gIVW       | 1.07213831  | 0.11585293 | 0.5476821  |
|                       |                           |                          | $r^2 \leq 0.5$   | 2 | 276,172   | HR / SD decrease in sclerostin levels                | gIVW       | 1.12022218  | 0.10221314 | 0.26670209 |
|                       |                           |                          | $r^2 \leq 0.8$   | 6 | 276,172   | HR / SD decrease in sclerostin levels                | gIVW       | 1.03596301  | 0.06504502 | 0.58700288 |
| Step-wise pruning     | Type 2 diabetes           | UK Biobank (survival)    | $r^2 \leq 0.001$ | 1 | 276,172   | HR / SD decrease in sclerostin levels                | Wald ratio | 1.56900258  | 0.32568088 | 0.16664279 |
|                       |                           |                          | $r^2 \leq 0.1$   | 1 | 276,172   | HR / SD decrease in sclerostin levels                | gIVW       | 1.56900258  | 0.32568088 | 0.16664279 |
|                       |                           |                          | $r^2 \leq 0.5$   | 2 | 276,172   | HR / SD decrease in sclerostin levels                | gIVW       | 1.66881184  | 0.28629863 | 0.07365778 |
|                       |                           |                          | $r^2 \leq 0.8$   | 6 | 276,172   | HR / SD decrease in sclerostin levels                | gIVW       | 1.65459767  | 0.18232995 | 0.00574846 |
| Random-effects method | Heel bone mineral density | GWAS                     | $r^2 \leq 0.3$   | 1 | 426,824   | Beta [SD change/SD decrease in sclerostin levels]    | Wald ratio | 1.12486981  | 0.0552528  | 3.90E-92   |
| Random-effects method | Hip fracture              | GWAS                     | $r^2 \leq 0.3$   | 1 | 735,354   | OR [SD change/SD decrease in sclerostin levels]      | Wald ratio | 0.12116527  | 0.4270796  | 7.74E-07   |
| Random-effects method | LDL cholesterol           | GWAS                     | $r^2 \leq 0.3$   | 1 | 1,228,508 | Beta [mg/dL change/SD decrease in sclerostin levels] | Wald ratio | 0.01730604  | 0.04112336 | 0.67387754 |
| Random-effects method | HDL cholesterol           | GWAS                     | $r^2 \leq 0.3$   | 1 | 1,244,439 | Beta [mg/dL change/SD decrease in sclerostin levels] | Wald ratio | -0.30898245 | 0.04076048 | 3.44E-14   |

|                       |                         |            |                |   |           |                                                       |            |             |            |            |
|-----------------------|-------------------------|------------|----------------|---|-----------|-------------------------------------------------------|------------|-------------|------------|------------|
| Random-effects method | Fasting glucose         | GWAS       | $r^2 \leq 0.3$ | 1 | 178,455   | Beta [mmol/L change/SD decrease in sclerostin levels] | Wald ratio | -0.01102141 | 0.05235169 | 0.83325692 |
| Random-effects method | HbA1c                   | GWAS       | $r^2 \leq 0.3$ | 1 | 132,400   | Beta [% change/SD decrease in sclerostin levels]      | Wald ratio | 0.01928747  | 0.03857493 | 0.61707508 |
| Random-effects method | Coronary artery disease | GWAS       | $r^2 \leq 0.3$ | 1 | 1,165,690 | OR [SD change/SD decrease in sclerostin levels]       | Wald ratio | 1.50850935  | 0.1456142  | 0.00475225 |
| Random-effects method | Myocardial infarction   | GWAS       | $r^2 \leq 0.3$ | 1 | ~639,000  | OR [SD change/SD decrease in sclerostin levels]       | Wald ratio | 1.4619486   | 0.22020775 | 0.08459966 |
| Random-effects method | Ischaemic stroke        | GWAS       | $r^2 \leq 0.3$ | 1 | 1,847,683 | OR [SD change/SD decrease in sclerostin levels]       | Wald ratio | 1.11038121  | 0.20114072 | 0.60268172 |
| Random-effects method | Hypertension            | GWAS       | $r^2 \leq 0.3$ | 1 | 462,933   | OR [SD change/SD decrease in sclerostin levels]       | Wald ratio | 1.03209637  | 0.02681732 | 0.23877818 |
| Random-effects method | Type 2 diabetes         | GWAS       | $r^2 \leq 0.3$ | 1 | 933,970   | OR [SD change/SD decrease in sclerostin levels]       | Wald ratio | 1.81831717  | 0.18736395 | 0.00141695 |
| Random-effects method | Cholesterol             | UK Biobank | $r^2 \leq 0.3$ | 1 | 263,285   | Beta [SD change/SD decrease in sclerostin levels]     | Wald ratio | 0.03712163  | 0.08183082 | 0.65008887 |
| Random-effects method | LDL cholesterol         | UK Biobank | $r^2 \leq 0.3$ | 1 | 262,794   | Beta [SD change/SD decrease in sclerostin levels]     | Wald ratio | 0.07041799  | 0.08297635 | 0.39607537 |
| Random-effects method | HDL cholesterol         | UK Biobank | $r^2 \leq 0.3$ | 1 | 241,065   | Beta [SD change/SD decrease in sclerostin levels]     | Wald ratio | -0.30712607 | 0.07900578 | 0.00010133 |
| Random-effects method | Triglycerides           | UK Biobank | $r^2 \leq 0.3$ | 1 | 263,067   | Beta [SD change/SD decrease in sclerostin levels]     | Wald ratio | 0.45840662  | 0.08130907 | 1.72E-08   |
| Random-effects method | Apolipoprotein-A        | UK Biobank | $r^2 \leq 0.3$ | 1 | 239,707   | Beta [SD change/SD decrease in sclerostin levels]     | Wald ratio | -0.22392764 | 0.08010977 | 0.0051858  |
| Random-effects method | Apolipoprotein-B        | UK Biobank | $r^2 \leq 0.3$ | 1 | 261,986   | Beta [SD change/SD decrease in sclerostin levels]     | Wald ratio | 0.15026865  | 0.08333518 | 0.07135937 |
| Random-effects method | C-Reactive protein      | UK Biobank | $r^2 \leq 0.3$ | 1 | 262,728   | Beta [SD change/SD decrease in sclerostin levels]     | Wald ratio | 0.04158791  | 0.0831949  | 0.61715578 |
| Random-effects method | Lipoprotein (a)         | UK Biobank | $r^2 \leq 0.3$ | 1 | 209,333   | Beta [SD change/SD decrease in sclerostin levels]     | Wald ratio | -0.03791987 | 0.09336314 | 0.684629   |

|                               |                           |                          |                |    |         |                                                   |            |            |            |            |
|-------------------------------|---------------------------|--------------------------|----------------|----|---------|---------------------------------------------------|------------|------------|------------|------------|
| Random-effects method         | Glucose                   | UK Biobank               | $r^2 \leq 0.3$ | 1  | 240,909 | Beta [SD change/SD decrease in sclerostin levels] | Wald ratio | 0.065245   | 0.086256   | 0.44940274 |
| Random-effects method         | HbA1c                     | UK Biobank               | $r^2 \leq 0.3$ | 1  | 263,079 | Beta [SD change/SD decrease in sclerostin levels] | Wald ratio | 0.00577451 | 0.08129073 | 0.94336968 |
| Random-effects method         | Coronary artery disease   | UK Biobank (categorical) | $r^2 \leq 0.3$ | 1  | 276,172 | OR [SD change/SD decrease in sclerostin levels]   | Wald ratio | 2.72020211 | 0.35153142 | 0.00441743 |
| Random-effects method         | Myocardial infarction     | UK Biobank (categorical) | $r^2 \leq 0.3$ | 1  | 276,065 | OR [SD change/SD decrease in sclerostin levels]   | Wald ratio | 2.66706624 | 0.42266155 | 0.02028919 |
| Random-effects method         | Ischaemic stroke          | UK Biobank (categorical) | $r^2 \leq 0.3$ | 1  | 276,172 | OR [SD change/SD decrease in sclerostin levels]   | Wald ratio | 2.93811502 | 0.69288847 | 0.11983383 |
| Random-effects method         | Hypertension              | UK Biobank (categorical) | $r^2 \leq 0.3$ | 1  | 271,359 | OR [SD change/SD decrease in sclerostin levels]   | Wald ratio | 1.2325754  | 0.1780945  | 0.24034363 |
| Random-effects method         | Type 2 diabetes           | UK Biobank (categorical) | $r^2 \leq 0.3$ | 1  | 266,268 | OR [SD change/SD decrease in sclerostin levels]   | Wald ratio | 1.50858669 | 0.30488516 | 0.17746009 |
| Random-effects method         | Coronary artery disease   | UK Biobank (survival)    | $r^2 \leq 0.3$ | 1  | 276,172 | HR [SD change/SD decrease in sclerostin levels]   | Wald ratio | 2.58383609 | 0.33310728 | 0.00437525 |
| Random-effects method         | Myocardial infarction     | UK Biobank (survival)    | $r^2 \leq 0.3$ | 1  | 276,172 | HR [SD change/SD decrease in sclerostin levels]   | Wald ratio | 2.61652135 | 0.40944941 | 0.01881785 |
| Random-effects method         | Ischaemic stroke          | UK Biobank (survival)    | $r^2 \leq 0.3$ | 1  | 276,172 | HR [SD change/SD decrease in sclerostin levels]   | Wald ratio | 2.89519075 | 0.68559593 | 0.12100948 |
| Random-effects method         | Hypertension              | UK Biobank (survival)    | $r^2 \leq 0.3$ | 1  | 276,172 | HR [SD change/SD decrease in sclerostin levels]   | Wald ratio | 1.18803669 | 0.13987401 | 0.21800965 |
| Random-effects method         | Type 2 diabetes           | UK Biobank (survival)    | $r^2 \leq 0.3$ | 1  | 276,172 | HR [SD change/SD decrease in sclerostin levels]   | Wald ratio | 1.42239061 | 0.39325945 | 0.37028194 |
| Principal components analysis | Heel bone mineral density | GWAS                     | $r^2 \leq 0.3$ | 76 | 426,824 | Beta [SD change/SD decrease in sclerostin levels] | IVW        | 0.94154294 | 0.03766465 | 2.07E-121  |
| Principal components analysis | Hip fracture              | GWAS                     | $r^2 \leq 0.3$ | 76 | 735,354 | OR [SD change/SD decrease in sclerostin levels]   | IVW        | 0.19890407 | 0.29719333 | 9.40E-08   |

|                                              |                         |                       |                |    |           |                                                       |      |             |            |            |
|----------------------------------------------|-------------------------|-----------------------|----------------|----|-----------|-------------------------------------------------------|------|-------------|------------|------------|
| Principal components analysis                | LDL cholesterol         | GWAS                  | $r^2 \leq 0.3$ | 76 | 1,228,508 | Beta [mg/dL change/SD decrease in sclerostin levels]  | IVW  | 0.00208898  | 0.02869987 | 0.94706043 |
| Principal components analysis                | HDL cholesterol         | GWAS                  | $r^2 \leq 0.3$ | 76 | 1,244,439 | Beta [mg/dL change/SD decrease in sclerostin levels]  | IVW  | -0.11481814 | 0.02847307 | 6.40E-05   |
| Principal components analysis                | Fasting glucose         | GWAS                  | $r^2 \leq 0.3$ | 76 | 178,455   | Beta [mmol/L change/SD decrease in sclerostin levels] | IVW  | 0.03867948  | 0.03779884 | 0.31057976 |
| Principal components analysis                | HbA1c                   | GWAS                  | $r^2 \leq 0.3$ | 76 | 132,400   | Beta [% change/SD decrease in sclerostin levels]      | IVW  | 0.01175036  | 0.02868469 | 0.6952268  |
| Principal components analysis                | Coronary artery disease | GWAS                  | $r^2 \leq 0.3$ | 76 | 1,165,690 | OR [SD change/SD decrease in sclerostin levels]       | IVW  | 1.20602835  | 0.10233798 | 0.06677434 |
| Principal components analysis                | Myocardial infarction   | GWAS                  | $r^2 \leq 0.3$ | 76 | ~639,000  | OR [SD change/SD decrease in sclerostin levels]       | IVW  | 1.30150483  | 0.15644801 | 0.09181376 |
| Principal components analysis                | Ischaemic stroke        | GWAS                  | $r^2 \leq 0.3$ | 76 | 1,847,683 | OR [SD change/SD decrease in sclerostin levels]       | IVW  | 1.15602434  | 0.14550135 | 0.32383292 |
| Principal components analysis                | Hypertension            | GWAS                  | $r^2 \leq 0.3$ | 76 | 462,933   | OR [SD change/SD decrease in sclerostin levels]       | IVW  | 1.02140871  | 0.01837844 | 0.25181914 |
| Principal components analysis                | Type 2 diabetes         | GWAS                  | $r^2 \leq 0.3$ | 76 | 933,970   | OR [SD change/SD decrease in sclerostin levels]       | IVW  | 1.42863957  | 0.13029785 | 0.00621373 |
| Survival analysis since UK Biobank enrolment | Coronary artery disease | UK Biobank (survival) | $r^2 \leq 0.3$ | 2  | 276,172   | HR [SD change/SD decrease in sclerostin levels]       | gIVW | 1.82073661  | 0.29815486 | 0.04444898 |
| Survival analysis since UK Biobank enrolment | Myocardial infarction   | UK Biobank (survival) | $r^2 \leq 0.3$ | 2  | 276,172   | HR [SD change/SD decrease in sclerostin levels]       | gIVW | 1.32316048  | 0.46505493 | 0.5470881  |
| Survival analysis since UK Biobank enrolment | Ischaemic stroke        | UK Biobank (survival) | $r^2 \leq 0.3$ | 2  | 276,172   | HR [SD change/SD decrease in sclerostin levels]       | gIVW | 1.05959671  | 0.5518593  | 0.91645755 |
| Survival analysis since UK Biobank enrolment | Hypertension            | UK Biobank (survival) | $r^2 \leq 0.3$ | 2  | 276,172   | HR [SD change/SD decrease in sclerostin levels]       | gIVW | 1.2575155   | 0.20022176 | 0.25244917 |
| Survival analysis since UK Biobank enrolment | Type 2 diabetes         | UK Biobank (survival) | $r^2 \leq 0.3$ | 2  | 276,172   | HR [SD change/SD decrease in sclerostin levels]       | gIVW | 1.95012545  | 0.37133237 | 0.07207546 |



**Supplementary Table 10.** Phenotyping codes used for UK Biobank outcomes.

| Continuous outcomes         |      |                                                                |                   |                          |                                                                                          |                                                                                                                                                              |
|-----------------------------|------|----------------------------------------------------------------|-------------------|--------------------------|------------------------------------------------------------------------------------------|--------------------------------------------------------------------------------------------------------------------------------------------------------------|
| Source data: UK Biobank     |      |                                                                |                   |                          |                                                                                          |                                                                                                                                                              |
| Field                       | Code | Description                                                    | Extra information | As continuous outcome    |                                                                                          |                                                                                                                                                              |
| 3148.0.0                    |      | Heel bone mineral density (BMD)                                |                   | Standardized to SD Value |                                                                                          |                                                                                                                                                              |
| 30690.0.0                   |      | Cholesterol                                                    |                   | Standardized to SD Value |                                                                                          |                                                                                                                                                              |
| 30780.0.0                   |      | LDL direct                                                     |                   | Standardized to SD Value |                                                                                          |                                                                                                                                                              |
| 30760.0.0                   |      | HDL cholesterol                                                |                   | Standardized to SD Valud |                                                                                          |                                                                                                                                                              |
| 30870.0.0                   |      | Triglycerides                                                  |                   | Standardized to SD Value |                                                                                          |                                                                                                                                                              |
| 30630.0.0                   |      | Apolipoprotein A                                               |                   | Standardized to SD Value |                                                                                          |                                                                                                                                                              |
| 30640.0.0                   |      | Apolipoprotein B                                               |                   | Standardized to SD Value |                                                                                          |                                                                                                                                                              |
| 30710.0.0                   |      | C-Reactive protein                                             |                   | Standardized to SD Value |                                                                                          |                                                                                                                                                              |
| 30790.0.0                   |      | Lipoprotein A                                                  |                   | Standardized to SD Value |                                                                                          |                                                                                                                                                              |
| 30750.0.0                   |      | Glycated haemoglobin (HbA1c)                                   |                   | Standardized to SD Value |                                                                                          |                                                                                                                                                              |
| 30740.0.0                   |      | Glucose                                                        |                   | Standardized to SD Value |                                                                                          |                                                                                                                                                              |
| Fracture risk outcome       |      |                                                                |                   |                          |                                                                                          |                                                                                                                                                              |
| Source data: UK Biobank     |      |                                                                |                   |                          |                                                                                          |                                                                                                                                                              |
| Field                       | Code | Description                                                    | Extra information | As binary utcome         | As survival outcome (since birth date)                                                   | As survival outcome (since enrolment date)                                                                                                                   |
| 3005                        |      | Fracture resulting from simple fall (from the last five years) |                   | Patient included         | Patient included, date of the event is the UK Biobank recruitment date (Field 53)        | Patient excluded                                                                                                                                             |
| 20002                       | 1632 | fracture shoulder / scapula                                    |                   | Patient included         | Patient included, years at the event is Field 20009 (Interpolated year/age of the event) | Patient excluded                                                                                                                                             |
| 20002                       | 1633 | fracture upper arm / humerus / elbow                           |                   | Patient included         | Patient included, years at the event is Field 20009 (Interpolated year/age of the event) | Patient excluded                                                                                                                                             |
| 20002                       | 1634 | fracture forearm / wrist                                       |                   | Patient included         | Patient included, years at the event is Field 20009 (Interpolated year/age of the event) | Patient excluded                                                                                                                                             |
| 20002                       | 1635 | fracture radius                                                |                   | Patient included         | Patient included, years at the event is Field 20009 (Interpolated year/age of the event) | Patient excluded                                                                                                                                             |
| 20002                       | 1637 | fracture wrist / colles fracture                               |                   | Patient included         | Patient included, years at the event is Field 20009 (Interpolated year/age of the event) | Patient excluded                                                                                                                                             |
| 20002                       | 1644 | fracture rib                                                   |                   | Patient included         | Patient included, years at the event is Field 20009 (Interpolated year/age of the event) | Patient excluded                                                                                                                                             |
| 20002                       | 1646 | fracture vertebra / crush fracture / vertebral collapse        |                   | Patient included         | Patient included, years at the event is Field 20009 (Interpolated year/age of the event) | Patient excluded                                                                                                                                             |
| 20002                       | 1647 | fracture pelvis                                                |                   | Patient included         | Patient included, years at the event is Field 20009 (Interpolated year/age of the event) | Patient excluded                                                                                                                                             |
| 20002                       | 1648 | fracture neck of femur / hip                                   |                   | Patient included         | Patient included, years at the event is Field 20009 (Interpolated year/age of the event) | Patient excluded                                                                                                                                             |
| Source data: Linkage to HES |      |                                                                |                   |                          |                                                                                          |                                                                                                                                                              |
| ICD-10                      | Code | Description                                                    | Extra information | As binary utcome         | As survival outcome (since birth date)                                                   | As survival outcome (since enrolment date)                                                                                                                   |
| S720                        |      | Fracture of neck of femur                                      |                   | Patient included         | Patient included, date of the event is the minimum between "epistart" and "admidate"     | Patient included if the first event was after the UK Biobank recruitment date (Field 53), date of the event is the minimum between "epistart" and "admidate" |
| S721                        |      | Pertrochanteric fracture                                       |                   | Patient included         | Patient included, date of the event is the minimum between "epistart" and "admidate"     | Patient included if the first event was after the UK Biobank recruitment date (Field 53), date of the event is the minimum between "epistart" and "admidate" |
| S729                        |      | Fracture of femur, part unspecified                            |                   | Patient included         | Patient included, date of the event is the minimum between "epistart" and "admidate"     | Patient included if the first event was after the UK Biobank recruitment date (Field 53), date of the event is the minimum between "epistart" and "admidate" |
| S722                        |      | Subtrochanteric fracture                                       |                   | Patient included         | Patient included, date of the event is the minimum between "epistart" and "admidate"     | Patient included if the first event was after the UK Biobank recruitment date (Field 53), date of the event is the minimum between "epistart" and "admidate" |
| S327                        |      | Multiple fractures of lumbar spine and pelvis                  |                   | Patient included         | Patient included, date of the event is the minimum between "epistart" and "admidate"     | Patient included if the first event was after the UK Biobank recruitment date (Field 53), date of the event is the minimum between "epistart" and "admidate" |
| S321                        |      | Fracture of sacrum                                             |                   | Patient included         | Patient included, date of the event is the minimum between "epistart" and "admidate"     | Patient included if the first event was after the UK Biobank recruitment date (Field 53), date of the event is the minimum between "epistart" and "admidate" |

[illegible]

|                                   |             |                                                                                                                |                          |                          |                                                                                      |                                                                                                                                                              |
|-----------------------------------|-------------|----------------------------------------------------------------------------------------------------------------|--------------------------|--------------------------|--------------------------------------------------------------------------------------|--------------------------------------------------------------------------------------------------------------------------------------------------------------|
| S529                              |             | Fracture of forearm, part unspecified                                                                          |                          | Patient included         | Patient included, date of the event is the minimum between "epistart" and "admidate" | Patient included if the first event was after the UK Biobank recruitment date (Field 53), date of the event is the minimum between "epistart" and "admidate" |
| <b>Source data: Linkage to GP</b> |             |                                                                                                                |                          |                          |                                                                                      |                                                                                                                                                              |
| <b>Read2 code</b>                 | <b>Code</b> | <b>Description</b>                                                                                             | <b>Extra information</b> | <b>As binary outcome</b> | <b>As survival outcome (since birth date)</b>                                        | <b>As survival outcome (since enrolment date)</b>                                                                                                            |
| 7K1D0                             |             | Primary open reduction and internal fixation of proximal femoral fracture with screw/nail and plate device     |                          | Patient included         | Patient included, date of the event is "event_dt"                                    | Patient included if the first event was after the UK Biobank recruitment date (Field 53), date of the event is "event_dt"                                    |
| 7K1DE                             |             | Primary open reduction of fracture of neck of femur and open fixation using proximal femoral nail antirotation |                          | Patient included         | Patient included, date of the event is "event_dt"                                    | Patient included if the first event was after the UK Biobank recruitment date (Field 53), date of the event is "event_dt"                                    |
| 7K1E6                             |             | Primary open reduction of fracture of elbow and fixation with Hook fixation plate                              |                          | Patient included         | Patient included, date of the event is "event_dt"                                    | Patient included if the first event was after the UK Biobank recruitment date (Field 53), date of the event is "event_dt"                                    |
| 7K1J0                             |             | Closed reduction and internal fixation of proximal femoral fracture with screw/nail device alone               |                          | Patient included         | Patient included, date of the event is "event_dt"                                    | Patient included if the first event was after the UK Biobank recruitment date (Field 53), date of the event is "event_dt"                                    |
| 7K1Jd                             |             | Closed reduction of intracapsular fracture of neck of femur and internal fixation using a dynamic hip screw    |                          | Patient included         | Patient included, date of the event is "event_dt"                                    | Patient included if the first event was after the UK Biobank recruitment date (Field 53), date of the event is "event_dt"                                    |
| 7K1L4                             |             | Closed reduction of fracture of hip                                                                            |                          | Patient included         | Patient included, date of the event is "event_dt"                                    | Patient included if the first event was after the UK Biobank recruitment date (Field 53), date of the event is "event_dt"                                    |
| 7K1L5                             |             | Closed reduction of fracture of femur                                                                          |                          | Patient included         | Patient included, date of the event is "event_dt"                                    | Patient included if the first event was after the UK Biobank recruitment date (Field 53), date of the event is "event_dt"                                    |
| 7K1LE                             |             | Closed reduction of fracture of elbow                                                                          |                          | Patient included         | Patient included, date of the event is "event_dt"                                    | Patient included if the first event was after the UK Biobank recruitment date (Field 53), date of the event is "event_dt"                                    |
| 7K1LF                             |             | Closed reduction of fracture of humerus                                                                        |                          | Patient included         | Patient included, date of the event is "event_dt"                                    | Patient included if the first event was after the UK Biobank recruitment date (Field 53), date of the event is "event_dt"                                    |
| 7K1LG                             |             | Closed reduction of fracture of shoulder                                                                       |                          | Patient included         | Patient included, date of the event is "event_dt"                                    | Patient included if the first event was after the UK Biobank recruitment date (Field 53), date of the event is "event_dt"                                    |
| 7K1LL                             |             | Closed reduction of fracture of radius and or ulna                                                             |                          | Patient included         | Patient included, date of the event is "event_dt"                                    | Patient included if the first event was after the UK Biobank recruitment date (Field 53), date of the event is "event_dt"                                    |
| 7K1LM                             |             | Closed reduction of fracture of wrist                                                                          |                          | Patient included         | Patient included, date of the event is "event_dt"                                    | Patient included if the first event was after the UK Biobank recruitment date (Field 53), date of the event is "event_dt"                                    |
| N1y1.                             |             | Fatigue fracture of vertebra                                                                                   |                          | Patient included         | Patient included, date of the event is "event_dt"                                    | Patient included if the first event was after the UK Biobank recruitment date (Field 53), date of the event is "event_dt"                                    |
| N3310                             |             | Pathological fracture of thoracic vertebra                                                                     |                          | Patient included         | Patient included, date of the event is "event_dt"                                    | Patient included if the first event was after the UK Biobank recruitment date (Field 53), date of the event is "event_dt"                                    |
| N3311                             |             | Pathological fracture of lumbar vertebra                                                                       |                          | Patient included         | Patient included, date of the event is "event_dt"                                    | Patient included if the first event was after the UK Biobank recruitment date (Field 53), date of the event is "event_dt"                                    |
| N3318                             |             | Osteoporosis + pathological fracture lumbar vertebrae                                                          |                          | Patient included         | Patient included, date of the event is "event_dt"                                    | Patient included if the first event was after the UK Biobank recruitment date (Field 53), date of the event is "event_dt"                                    |
| N3319                             |             | Osteoporosis + pathological fracture thoracic vertebrae                                                        |                          | Patient included         | Patient included, date of the event is "event_dt"                                    | Patient included if the first event was after the UK Biobank recruitment date (Field 53), date of the event is "event_dt"                                    |
| S102.                             |             | Closed fracture thoracic vertebra                                                                              |                          | Patient included         | Patient included, date of the event is "event_dt"                                    | Patient included if the first event was after the UK Biobank recruitment date (Field 53), date of the event is "event_dt"                                    |
| S1020                             |             | Closed fracture thoracic vertebra, burst                                                                       |                          | Patient included         | Patient included, date of the event is "event_dt"                                    | Patient included if the first event was after the UK Biobank recruitment date (Field 53), date of the event is "event_dt"                                    |
| S1021                             |             | Closed fracture thoracic vertebra, wedge                                                                       |                          | Patient included         | Patient included, date of the event is "event_dt"                                    | Patient included if the first event was after the UK Biobank recruitment date (Field 53), date of the event is "event_dt"                                    |
| S1022                             |             | Closed fracture thoracic vertebra, spondylolysis                                                               |                          | Patient included         | Patient included, date of the event is "event_dt"                                    | Patient included if the first event was after the UK Biobank recruitment date (Field 53), date of the event is "event_dt"                                    |
| S102y                             |             | Other specified closed fracture thoracic vertebra                                                              |                          | Patient included         | Patient included, date of the event is "event_dt"                                    | Patient included if the first event was after the UK Biobank recruitment date (Field 53), date of the event is "event_dt"                                    |
| S102z                             |             | Closed fracture thoracic vertebra not otherwise specified                                                      |                          | Patient included         | Patient included, date of the event is "event_dt"                                    | Patient included if the first event was after the UK Biobank recruitment date (Field 53), date of the event is "event_dt"                                    |
| S104.                             |             | Closed fracture lumbar vertebra                                                                                |                          | Patient included         | Patient included, date of the event is "event_dt"                                    | Patient included if the first event was after the UK Biobank recruitment date (Field 53), date of the event is "event_dt"                                    |
| S1040                             |             | Closed fracture lumbar vertebra, burst                                                                         |                          | Patient included         | Patient included, date of the event is "event_dt"                                    | Patient included if the first event was after the UK Biobank recruitment date (Field 53), date of the event is "event_dt"                                    |

[illegible]

[illegible]

[illegible]

[illegible]

[illegible]



[illegible]

[illegible]

|                                        |      |                                                                             |                   |                   |                                                                                          |                                                                                                                                                               |
|----------------------------------------|------|-----------------------------------------------------------------------------|-------------------|-------------------|------------------------------------------------------------------------------------------|---------------------------------------------------------------------------------------------------------------------------------------------------------------|
| S2351                                  |      | Open Colles' fracture                                                       |                   | Patient included  | Patient included, date of the event is "event_dt"                                        | Patient included if the first event was after the UK Biobank recruitment date (Field 53), date of the event is "event_dt"                                     |
| <b>Coronary artery disease outcome</b> |      |                                                                             |                   |                   |                                                                                          |                                                                                                                                                               |
| <i>Source data: Linkage to HES</i>     |      |                                                                             |                   |                   |                                                                                          |                                                                                                                                                               |
| ICD10                                  | Code | Description                                                                 | Extra information | As binary outcome | As survival outcome (since birth date)                                                   | As survival outcome (since enrolment date)                                                                                                                    |
| I251                                   |      | Atherosclerotic heart disease                                               |                   | Patient included  | Patient included, date of the event is the Minimum between "epistart" and "admidate"     | Patient included if the first event was after the UK Biobank recruitment date (Field 53), date of the event is the minimum between "epistart" and "admidate". |
| <i>Source data: Linkage to GP</i>      |      |                                                                             |                   |                   |                                                                                          |                                                                                                                                                               |
| Read2 code                             | Code | Description                                                                 | Extra information | As binary outcome | As survival outcome (since birth date)                                                   | As survival outcome (since enrolment date)                                                                                                                    |
| G340.                                  |      | Coronary atherosclerosis                                                    |                   | Patient included  | Patient included, date of the event is "event_dt"                                        | Patient included if the first event was after the UK Biobank recruitment date (Field 53), date of the event is "event_dt"                                     |
| G3400                                  |      | Single coronary vessel disease                                              |                   | Patient included  | Patient included, date of the event is "event_dt"                                        | Patient included if the first event was after the UK Biobank recruitment date (Field 53), date of the event is "event_dt"                                     |
| G3401                                  |      | Double coronary vessel disease                                              |                   | Patient included  | Patient included, date of the event is "event_dt"                                        | Patient included if the first event was after the UK Biobank recruitment date (Field 53), date of the event is "event_dt"                                     |
| G704.                                  |      | Non-obstructive coronary atherosclerosis                                    |                   | Patient included  | Patient included, date of the event is "event_dt"                                        | Patient included if the first event was after the UK Biobank recruitment date (Field 53), date of the event is "event_dt"                                     |
| <b>Myocardial infarction outcome</b>   |      |                                                                             |                   |                   |                                                                                          |                                                                                                                                                               |
| <i>Source data: UK Biobank</i>         |      |                                                                             |                   |                   |                                                                                          |                                                                                                                                                               |
| Field                                  | Code | Description                                                                 | Extra information | As binary outcome | As survival outcome (since birth date)                                                   | As survival outcome (since enrolment date)                                                                                                                    |
| 3894                                   |      | Age heart attack diagnosed                                                  |                   | Patient included  | Patient included, years at the event is provided by the same field                       | Patient excluded                                                                                                                                              |
| 20002                                  | 1075 | Non-cancer illness code, self-reported - Heart attack/Myocardial infarction |                   | Patient included  | Patient included, years at the event is Field 20009 (Interpolated year/age of the event) | Patient excluded                                                                                                                                              |
| <i>Source data: Linkage to HES</i>     |      |                                                                             |                   |                   |                                                                                          |                                                                                                                                                               |
| ICD10                                  | Code | Description                                                                 | Extra information | As binary outcome | As survival outcome (since birth date)                                                   | As survival outcome (since enrolment date)                                                                                                                    |
| I21                                    |      | Acute myocardial infarction                                                 |                   | Patient included  | Patient included, date of the event is the minimum between "epistart" and "admidate"     | Patient included if the first event was after the UK Biobank recruitment date (Field 53), date of the event is the minimum between "epistart" and "admidate"  |
| I210                                   |      | Acute transmural myocardial infarction of anterior wall                     |                   | Patient included  | Patient included, date of the event is the minimum between "epistart" and "admidate"     | Patient included if the first event was after the UK Biobank recruitment date (Field 53), date of the event is the minimum between "epistart" and "admidate"  |
| I211                                   |      | Acute transmural myocardial infarction of inferior wall                     |                   | Patient included  | Patient included, date of the event is the minimum between "epistart" and "admidate"     | Patient included if the first event was after the UK Biobank recruitment date (Field 53), date of the event is the minimum between "epistart" and "admidate"  |
| I212                                   |      | Acute transmural myocardial infarction of other sites                       |                   | Patient included  | Patient included, date of the event is the minimum between "epistart" and "admidate"     | Patient included if the first event was after the UK Biobank recruitment date (Field 53), date of the event is the minimum between "epistart" and "admidate"  |
| I213                                   |      | Acute transmural myocardial infarction of unspecified site                  |                   | Patient included  | Patient included, date of the event is the minimum between "epistart" and "admidate"     | Patient included if the first event was after the UK Biobank recruitment date (Field 53), date of the event is the minimum between "epistart" and "admidate"  |
| I214                                   |      | Acute subendocardial myocardial infarction                                  |                   | Patient included  | Patient included, date of the event is the minimum between "epistart" and "admidate"     | Patient included if the first event was after the UK Biobank recruitment date (Field 53), date of the event is the minimum between "epistart" and "admidate"  |
| I219                                   |      | Acute myocardial infarction, unspecified                                    |                   | Patient included  | Patient included, date of the event is the minimum between "epistart" and "admidate"     | Patient included if the first event was after the UK Biobank recruitment date (Field 53), date of the event is the minimum between "epistart" and "admidate"  |
| I22                                    |      | Subsequent myocardial infarction                                            |                   | Patient included  | Patient included, date of the event is the minimum between "epistart" and "admidate"     | Patient included if the first event was after the UK Biobank recruitment date (Field 53), date of the event is the minimum between "epistart" and "admidate"  |
| I220                                   |      | Subsequent myocardial infarction of anterior wall                           |                   | Patient included  | Patient included, date of the event is the minimum between "epistart" and "admidate"     | Patient included if the first event was after the UK Biobank recruitment date (Field 53), date of the event is the minimum between "epistart" and "admidate"  |
| I221                                   |      | Subsequent myocardial infarction of inferior wall                           |                   | Patient included  | Patient included, date of the event is the minimum between "epistart" and "admidate"     | Patient included if the first event was after the UK Biobank recruitment date (Field 53), date of the event is the minimum between "epistart" and "admidate"  |
| I228                                   |      | Subsequent myocardial infarction of other sites                             |                   | Patient included  | Patient included, date of the event is the minimum between "epistart" and "admidate"     | Patient included if the first event was after the UK Biobank recruitment date (Field 53), date of the event is the minimum between "epistart" and "admidate"  |

|                                   |             |                                                                                                                         |                          |                          |                                                                                      |                                                                                                                                                              |
|-----------------------------------|-------------|-------------------------------------------------------------------------------------------------------------------------|--------------------------|--------------------------|--------------------------------------------------------------------------------------|--------------------------------------------------------------------------------------------------------------------------------------------------------------|
| I229                              |             | Subsequent myocardial infarction of unspecified site                                                                    |                          | Patient included         | Patient included, date of the event is the minimum between "epistart" and "admidate" | Patient included if the first event was after the UK Biobank recruitment date (Field 53), date of the event is the minimum between "epistart" and "admidate" |
| I23                               |             | Certain current complications following acute myocardial infarction                                                     |                          | Patient included         | Patient included, date of the event is the minimum between "epistart" and "admidate" | Patient included if the first event was after the UK Biobank recruitment date (Field 53), date of the event is the minimum between "epistart" and "admidate" |
| I230                              |             | Haemopericardium as current complication following acute myocardial infarction                                          |                          | Patient included         | Patient included, date of the event is the minimum between "epistart" and "admidate" | Patient included if the first event was after the UK Biobank recruitment date (Field 53), date of the event is the minimum between "epistart" and "admidate" |
| I231                              |             | Atrial septal defect as current complication following acute myocardial infarction                                      |                          | Patient included         | Patient included, date of the event is the minimum between "epistart" and "admidate" | Patient included if the first event was after the UK Biobank recruitment date (Field 53), date of the event is the minimum between "epistart" and "admidate" |
| I232                              |             | Ventricular septal defect as current complication following acute myocardial infarction                                 |                          | Patient included         | Patient included, date of the event is the minimum between "epistart" and "admidate" | Patient included if the first event was after the UK Biobank recruitment date (Field 53), date of the event is the minimum between "epistart" and "admidate" |
| I233                              |             | Rupture of cardiac wall without haemopericardium as current complication following acute myocardial infarction          |                          | Patient included         | Patient included, date of the event is the minimum between "epistart" and "admidate" | Patient included if the first event was after the UK Biobank recruitment date (Field 53), date of the event is the minimum between "epistart" and "admidate" |
| I234                              |             | Rupture of chordae tendineae as current complication following acute myocardial infarction                              |                          | Patient included         | Patient included, date of the event is the minimum between "epistart" and "admidate" | Patient included if the first event was after the UK Biobank recruitment date (Field 53), date of the event is the minimum between "epistart" and "admidate" |
| I235                              |             | Rupture of papillary muscle as current complication following acute myocardial infarction                               |                          | Patient included         | Patient included, date of the event is the minimum between "epistart" and "admidate" | Patient included if the first event was after the UK Biobank recruitment date (Field 53), date of the event is the minimum between "epistart" and "admidate" |
| I236                              |             | Thrombosis of atrium, auricular appendage, and ventricle as current complications following acute myocardial infarction |                          | Patient included         | Patient included, date of the event is the minimum between "epistart" and "admidate" | Patient included if the first event was after the UK Biobank recruitment date (Field 53), date of the event is the minimum between "epistart" and "admidate" |
| I238                              |             | Other current complications following acute myocardial infarction                                                       |                          | Patient included         | Patient included, date of the event is the minimum between "epistart" and "admidate" | Patient included if the first event was after the UK Biobank recruitment date (Field 53), date of the event is the minimum between "epistart" and "admidate" |
| <b>Source data: Linkage to GP</b> |             |                                                                                                                         |                          |                          |                                                                                      |                                                                                                                                                              |
| <b>Read2 code</b>                 | <b>Code</b> | <b>Description</b>                                                                                                      | <b>Extra information</b> | <b>As binary outcome</b> | <b>As survival outcome (since birth date)</b>                                        | <b>As survival outcome (since enrolment date)</b>                                                                                                            |
| G300.                             |             | Acute anterolateral infarction                                                                                          |                          | Patient included         | Patient included, date of the event is "event_dt"                                    | Patient included if the first event was after the UK Biobank recruitment date (Field 53), date of the event is "event_dt"                                    |
| G301.                             |             | Other specified anterior myocardial infarction                                                                          |                          | Patient included         | Patient included, date of the event is "event_dt"                                    | Patient included if the first event was after the UK Biobank recruitment date (Field 53), date of the event is "event_dt"                                    |
| G3010                             |             | Acute anteroapical infarction                                                                                           |                          | Patient included         | Patient included, date of the event is "event_dt"                                    | Patient included if the first event was after the UK Biobank recruitment date (Field 53), date of the event is "event_dt"                                    |
| G3011                             |             | Acute anteroseptal infarction                                                                                           |                          | Patient included         | Patient included, date of the event is "event_dt"                                    | Patient included if the first event was after the UK Biobank recruitment date (Field 53), date of the event is "event_dt"                                    |
| G301z                             |             | Anterior myocardial infarction NOS                                                                                      |                          | Patient included         | Patient included, date of the event is "event_dt"                                    | Patient included if the first event was after the UK Biobank recruitment date (Field 53), date of the event is "event_dt"                                    |
| G302.                             |             | Acute inferolateral infarction                                                                                          |                          | Patient included         | Patient included, date of the event is "event_dt"                                    | Patient included if the first event was after the UK Biobank recruitment date (Field 53), date of the event is "event_dt"                                    |
| G303.                             |             | Acute inferoposterior infarction                                                                                        |                          | Patient included         | Patient included, date of the event is "event_dt"                                    | Patient included if the first event was after the UK Biobank recruitment date (Field 53), date of the event is "event_dt"                                    |
| G304.                             |             | Posterior myocardial infarction NOS                                                                                     |                          | Patient included         | Patient included, date of the event is "event_dt"                                    | Patient included if the first event was after the UK Biobank recruitment date (Field 53), date of the event is "event_dt"                                    |
| G305.                             |             | Lateral myocardial infarction NOS                                                                                       |                          | Patient included         | Patient included, date of the event is "event_dt"                                    | Patient included if the first event was after the UK Biobank recruitment date (Field 53), date of the event is "event_dt"                                    |
| G306.                             |             | True posterior myocardial infarction                                                                                    |                          | Patient included         | Patient included, date of the event is "event_dt"                                    | Patient included if the first event was after the UK Biobank recruitment date (Field 53), date of the event is "event_dt"                                    |
| G307.                             |             | Acute subendocardial infarction                                                                                         |                          | Patient included         | Patient included, date of the event is "event_dt"                                    | Patient included if the first event was after the UK Biobank recruitment date (Field 53), date of the event is "event_dt"                                    |
| G3070                             |             | Acute non-Q wave infarction                                                                                             |                          | Patient included         | Patient included, date of the event is "event_dt"                                    | Patient included if the first event was after the UK Biobank recruitment date (Field 53), date of the event is "event_dt"                                    |
| G3071                             |             | Acute non-ST segment elevation myocardial infarction                                                                    |                          | Patient included         | Patient included, date of the event is "event_dt"                                    | Patient included if the first event was after the UK Biobank recruitment date (Field 53), date of the event is "event_dt"                                    |

[illegible]

|       |  |                                                                      |  |                  |                                                   |                                                                                                                           |
|-------|--|----------------------------------------------------------------------|--|------------------|---------------------------------------------------|---------------------------------------------------------------------------------------------------------------------------|
| G380. |  | Postoperative transmural myocardial infarction of anterior wall      |  | Patient included | Patient included, date of the event is "event_dt" | Patient included if the first event was after the UK Biobank recruitment date (Field 53), date of the event is "event_dt" |
| G381. |  | Postoperative transmural myocardial infarction of inferior wall      |  | Patient included | Patient included, date of the event is "event_dt" | Patient included if the first event was after the UK Biobank recruitment date (Field 53), date of the event is "event_dt" |
| G382. |  | Postoperative transmural myocardial infarction of other sites        |  | Patient included | Patient included, date of the event is "event_dt" | Patient included if the first event was after the UK Biobank recruitment date (Field 53), date of the event is "event_dt" |
| G383. |  | Postoperative transmural myocardial infarction of unspecified site   |  | Patient included | Patient included, date of the event is "event_dt" | Patient included if the first event was after the UK Biobank recruitment date (Field 53), date of the event is "event_dt" |
| G384. |  | Postoperative subendocardial myocardial infarction                   |  | Patient included | Patient included, date of the event is "event_dt" | Patient included if the first event was after the UK Biobank recruitment date (Field 53), date of the event is "event_dt" |
| G38z. |  | Postoperative myocardial infarction, unspecified                     |  | Patient included | Patient included, date of the event is "event_dt" | Patient included if the first event was after the UK Biobank recruitment date (Field 53), date of the event is "event_dt" |
| G501. |  | Post infarction pericarditis                                         |  | Patient included | Patient included, date of the event is "event_dt" | Patient included if the first event was after the UK Biobank recruitment date (Field 53), date of the event is "event_dt" |
| Gyu31 |  | [X]Other current complications following acute myocardial infarction |  | Patient included | Patient included, date of the event is "event_dt" | Patient included if the first event was after the UK Biobank recruitment date (Field 53), date of the event is "event_dt" |
| Gyu34 |  | [X]Acute transmural myocardial infarction of unspecified site        |  | Patient included | Patient included, date of the event is "event_dt" | Patient included if the first event was after the UK Biobank recruitment date (Field 53), date of the event is "event_dt" |
| Gyu35 |  | [X]Subsequent myocardial infarction of other sites                   |  | Patient included | Patient included, date of the event is "event_dt" | Patient included if the first event was after the UK Biobank recruitment date (Field 53), date of the event is "event_dt" |
| Gyu36 |  | [X]Subsequent myocardial infarction of unspecified site              |  | Patient included | Patient included, date of the event is "event_dt" | Patient included if the first event was after the UK Biobank recruitment date (Field 53), date of the event is "event_dt" |

## Ischaemic stroke outcome

Source data: UK Biobank

| Field | Code | Description      | Extra information | As binary outcome | As survival outcome (since birth date)                                                               | As survival outcome (since enrolment date) |
|-------|------|------------------|-------------------|-------------------|------------------------------------------------------------------------------------------------------|--------------------------------------------|
| 20002 | 1583 | Ischaemic stroke |                   | Patient included  | Patient included, years at the event is provided by Field 20009 (Interpolated year/age of the event) | Patient excluded                           |

*Source data: Linkage to HES*

| ICD10 | Code | Description                                                                                | Extra information | As binary outcome | As survival outcome (since birth date)                                               | As survival outcome (since enrolment date)                                                                                                                   |
|-------|------|--------------------------------------------------------------------------------------------|-------------------|-------------------|--------------------------------------------------------------------------------------|--------------------------------------------------------------------------------------------------------------------------------------------------------------|
| I63   |      | I63 Cerebral infarction                                                                    |                   | Patient included  | Patient included, date of the event is the minimum between "epistart" and "admidate" | Patient included if the first event was after the UK Biobank recruitment date (Field 53), date of the event is the minimum between "epistart" and "admidate" |
| I630  |      | I63.0 Cerebral infarction due to thrombosis of precerebral arteries                        |                   | Patient included  | Patient included, date of the event is the minimum between "epistart" and "admidate" | Patient included if the first event was after the UK Biobank recruitment date (Field 53), date of the event is the minimum between "epistart" and "admidate" |
| I631  |      | I63.1 Cerebral infarction due to embolism of precerebral arteries                          |                   | Patient included  | Patient included, date of the event is the minimum between "epistart" and "admidate" | Patient included if the first event was after the UK Biobank recruitment date (Field 53), date of the event is the minimum between "epistart" and "admidate" |
| I632  |      | I63.2 Cerebral infarction due to unspecified occlusion or stenosis of precerebral arteries |                   | Patient included  | Patient included, date of the event is the minimum between "epistart" and "admidate" | Patient included if the first event was after the UK Biobank recruitment date (Field 53), date of the event is the minimum between "epistart" and "admidate" |
| I633  |      | I63.3 Cerebral infarction due to thrombosis of cerebral arteries                           |                   | Patient included  | Patient included, date of the event is the minimum between "epistart" and "admidate" | Patient included if the first event was after the UK Biobank recruitment date (Field 53), date of the event is the minimum between "epistart" and "admidate" |
| I634  |      | I63.4 Cerebral infarction due to embolism of cerebral arteries                             |                   | Patient included  | Patient included, date of the event is the minimum between "epistart" and "admidate" | Patient included if the first event was after the UK Biobank recruitment date (Field 53), date of the event is the minimum between "epistart" and "admidate" |
| I635  |      | I63.5 Cerebral infarction due to unspecified occlusion or stenosis of cerebral arteries    |                   | Patient included  | Patient included, date of the event is the minimum between "epistart" and "admidate" | Patient included if the first event was after the UK Biobank recruitment date (Field 53), date of the event is the minimum between "epistart" and "admidate" |
| I636  |      | I63.6 Cerebral infarction due to cerebral venous thrombosis, nonpyogenic                   |                   | Patient included  | Patient included, date of the event is the minimum between "epistart" and "admidate" | Patient included if the first event was after the UK Biobank recruitment date (Field 53), date of the event is the minimum between "epistart" and "admidate" |
| I638  |      | I63.8 Other cerebral infarction                                                            |                   | Patient included  | Patient included, date of the event is the minimum between "epistart" and "admidate" | Patient included if the first event was after the UK Biobank recruitment date (Field 53), date of the event is the minimum between "epistart" and "admidate" |
| I639  |      | I63.9 Cerebral infarction, unspecified                                                     |                   | Patient included  | Patient included, date of the event is the minimum between "epistart" and "admidate" | Patient included if the first event was after the UK Biobank recruitment date (Field 53), date of the event is the minimum between "epistart" and "admidate" |

*Source data: Linkage to GP*

| Read2 code                         | Code | Description                                                                             | Extra information | As binary outcome | As survival outcome (since birth date)                                                   | As survival outcome (since enrolment date)                                                                                                                   |
|------------------------------------|------|-----------------------------------------------------------------------------------------|-------------------|-------------------|------------------------------------------------------------------------------------------|--------------------------------------------------------------------------------------------------------------------------------------------------------------|
| G63y0                              |      | Cerebral infarct due to thrombosis of precerebral arteries                              |                   | Patient included  | Patient included, date of the event is "event_dt"                                        | Patient included if the first event was after the UK Biobank recruitment date (Field 53), date of the event is "event_dt"                                    |
| G63y1                              |      | Cerebral infarction due to embolism of precerebral arteries                             |                   | Patient included  | Patient included, date of the event is "event_dt"                                        | Patient included if the first event was after the UK Biobank recruitment date (Field 53), date of the event is "event_dt"                                    |
| G6400                              |      | Cerebral infarction due to thrombosis of cerebral arteries                              |                   | Patient included  | Patient included, date of the event is "event_dt"                                        | Patient included if the first event was after the UK Biobank recruitment date (Field 53), date of the event is "event_dt"                                    |
| G6410                              |      | Cerebral infarction due to embolism of cerebral arteries                                |                   | Patient included  | Patient included, date of the event is "event_dt"                                        | Patient included if the first event was after the UK Biobank recruitment date (Field 53), date of the event is "event_dt"                                    |
| G64z.                              |      | Cerebral infarction NOS                                                                 |                   | Patient included  | Patient included, date of the event is "event_dt"                                        | Patient included if the first event was after the UK Biobank recruitment date (Field 53), date of the event is "event_dt"                                    |
| G64z0                              |      | Brainstem infarction                                                                    |                   | Patient included  | Patient included, date of the event is "event_dt"                                        | Patient included if the first event was after the UK Biobank recruitment date (Field 53), date of the event is "event_dt"                                    |
| G64z2                              |      | Left sided cerebral infarction                                                          |                   | Patient included  | Patient included, date of the event is "event_dt"                                        | Patient included if the first event was after the UK Biobank recruitment date (Field 53), date of the event is "event_dt"                                    |
| G64z3                              |      | Right sided cerebral infarction                                                         |                   | Patient included  | Patient included, date of the event is "event_dt"                                        | Patient included if the first event was after the UK Biobank recruitment date (Field 53), date of the event is "event_dt"                                    |
| G64z4                              |      | Infarction of basal ganglia                                                             |                   | Patient included  | Patient included, date of the event is "event_dt"                                        | Patient included if the first event was after the UK Biobank recruitment date (Field 53), date of the event is "event_dt"                                    |
| G6760                              |      | Cerebral infarction due to cerebral venous thrombosis, nonpyogenic                      |                   | Patient included  | Patient included, date of the event is "event_dt"                                        | Patient included if the first event was after the UK Biobank recruitment date (Field 53), date of the event is "event_dt"                                    |
| G6W..                              |      | Cerebral infarction due to unspecified occlusion or stenosis of precerebral arteries    |                   | Patient included  | Patient included, date of the event is "event_dt"                                        | Patient included if the first event was after the UK Biobank recruitment date (Field 53), date of the event is "event_dt"                                    |
| G6X..                              |      | Cerebral infarction due to unspecified occlusion or stenosis of cerebral arteries       |                   | Patient included  | Patient included, date of the event is "event_dt"                                        | Patient included if the first event was after the UK Biobank recruitment date (Field 53), date of the event is "event_dt"                                    |
| Gyu63                              |      | [X]Cerebral infarction due to unspecified occlusion or stenosis of cerebral arteries    |                   | Patient included  | Patient included, date of the event is "event_dt"                                        | Patient included if the first event was after the UK Biobank recruitment date (Field 53), date of the event is "event_dt"                                    |
| Gyu64                              |      | [X]Other cerebral infarction                                                            |                   | Patient included  | Patient included, date of the event is "event_dt"                                        | Patient included if the first event was after the UK Biobank recruitment date (Field 53), date of the event is "event_dt"                                    |
| Gyu6G                              |      | [X]Cerebral infarction due to unspecified occlusion or stenosis of precerebral arteries |                   | Patient included  | Patient included, date of the event is "event_dt"                                        | Patient included if the first event was after the UK Biobank recruitment date (Field 53), date of the event is "event_dt"                                    |
| <b>Hypertension outcome</b>        |      |                                                                                         |                   |                   |                                                                                          |                                                                                                                                                              |
| <b>Source data: UK Biobank</b>     |      |                                                                                         |                   |                   |                                                                                          |                                                                                                                                                              |
| Field                              | Code | Description                                                                             | Extra information | As binary outcome | As survival outcome (since birth date)                                                   | As survival outcome (since enrolment date)                                                                                                                   |
| 20002                              | 1065 | Non-cancer illness code, self-reported - Hypertension                                   |                   | Patient included  | Patient included, years at the event is Field 20009 (Interpolated year/age of the event) | Patient excluded                                                                                                                                             |
| <b>Source data: Linkage to HES</b> |      |                                                                                         |                   |                   |                                                                                          |                                                                                                                                                              |
| ICD10                              | Code | Description                                                                             | Extra information | As binary outcome | As survival outcome (since birth date)                                                   | As survival outcome (since enrolment date)                                                                                                                   |
| I10                                |      | Essential (primary) hypertension                                                        |                   | Patient included  | Patient included, date of the event is the minimum between "epistart" and "admidate"     | Patient included if the first event was after the UK Biobank recruitment date (Field 53), date of the event is the minimum between "epistart" and "admidate" |
| I11                                |      | Hypertensive heart disease                                                              |                   | Patient included  | Patient included, date of the event is the minimum between "epistart" and "admidate"     | Patient included if the first event was after the UK Biobank recruitment date (Field 53), date of the event is the minimum between "epistart" and "admidate" |
| I110                               |      | Hypertensive heart disease with (congestive) heart failure                              |                   | Patient included  | Patient included, date of the event is the minimum between "epistart" and "admidate"     | Patient included if the first event was after the UK Biobank recruitment date (Field 53), date of the event is the minimum between "epistart" and "admidate" |
| I119                               |      | Hypertensive heart disease without (congestive) heart failure                           |                   | Patient included  | Patient included, date of the event is the minimum between "epistart" and "admidate"     | Patient included if the first event was after the UK Biobank recruitment date (Field 53), date of the event is the minimum between "epistart" and "admidate" |
| I12                                |      | Hypertensive renal disease                                                              |                   | Patient included  | Patient included, date of the event is the minimum between "epistart" and "admidate"     | Patient included if the first event was after the UK Biobank recruitment date (Field 53), date of the event is the minimum between "epistart" and "admidate" |
| I120                               |      | Hypertensive renal disease with renal failure                                           |                   | Patient included  | Patient included, date of the event is the minimum between "epistart" and "admidate"     | Patient included if the first event was after the UK Biobank recruitment date (Field 53), date of the event is the minimum between "epistart" and "admidate" |
| I129                               |      | Hypertensive renal disease without renal failure                                        |                   | Patient included  | Patient included, date of the event is the minimum between "epistart" and "admidate"     | Patient included if the first event was after the UK Biobank recruitment date (Field 53), date of the event is the minimum between "epistart" and "admidate" |

[illegible]



[illegible]

| Field | Code       | Description                                              | Extra information | As binary outcome | As survival outcome (since birth date)                                                               | As survival outcome (since enrolment date) |
|-------|------------|----------------------------------------------------------|-------------------|-------------------|------------------------------------------------------------------------------------------------------|--------------------------------------------|
| 2443  |            | Diabetes diagnosed by a doctor                           |                   | Patient included  | Patient included, years at the event is provided by Field 2976 (Age diabetes diagnosed)              | Patient excluded                           |
| 20002 | 1223       | Non-cancer illness code, self-reported - Type 2 diabetes |                   | Patient included  | Patient included, years at the event is provided by field 20009 (Interpolated year/age of the event) | Patient excluded                           |
| 20003 | 1140874646 | Glipizide                                                |                   | Patient included  | Patient excluded                                                                                     | Patient excluded                           |
| 20003 | 1140874664 | Tolazamide                                               |                   | Patient included  | Patient excluded                                                                                     | Patient excluded                           |
| 20003 | 1140874674 | Tolbutamide                                              |                   | Patient included  | Patient excluded                                                                                     | Patient excluded                           |
| 20003 | 1140874686 | Glucophage                                               |                   | Patient included  | Patient excluded                                                                                     | Patient excluded                           |
| 20003 | 1140874706 | Chlorpropamide)                                          |                   | Patient included  | Patient excluded                                                                                     | Patient excluded                           |
| 20003 | 1140874718 | Glibenclamide                                            |                   | Patient included  | Patient excluded                                                                                     | Patient excluded                           |
| 20003 | 1140874744 | Gliclazide                                               |                   | Patient included  | Patient excluded                                                                                     | Patient excluded                           |
| 20003 | 1141189090 | Rosiglitazone/Metformin                                  |                   | Patient included  | Patient excluded                                                                                     | Patient excluded                           |
| 20003 | 1141171646 | Pioglitazone                                             |                   | Patient included  | Patient excluded                                                                                     | Patient excluded                           |
| 20003 | 1140868902 | Acarbose                                                 |                   | Patient included  | Patient excluded                                                                                     | Patient excluded                           |
| 20003 | 1141168660 | Repaglinide                                              |                   | Patient included  | Patient excluded                                                                                     | Patient excluded                           |
| 20003 | 1141152590 | Glimepiride                                              |                   | Patient included  | Patient excluded                                                                                     | Patient excluded                           |
| 20003 | 1140874650 | Glibenese                                                |                   | Patient included  | Patient excluded                                                                                     | Patient excluded                           |
| 20003 | 1140874652 | Minodiab                                                 |                   | Patient included  | Patient excluded                                                                                     | Patient excluded                           |
| 20003 | 1140874658 | Gliquidone                                               |                   | Patient included  | Patient excluded                                                                                     | Patient excluded                           |
| 20003 | 1140874660 | Glurenorm                                                |                   | Patient included  | Patient excluded                                                                                     | Patient excluded                           |
| 20003 | 1140874666 | Tolanase                                                 |                   | Patient included  | Patient excluded                                                                                     | Patient excluded                           |
| 20003 | 1140874678 | Glyconon                                                 |                   | Patient included  | Patient excluded                                                                                     | Patient excluded                           |
| 20003 | 1140874680 | Rastinon                                                 |                   | Patient included  | Patient excluded                                                                                     | Patient excluded                           |
| 20003 | 1140874690 | Orabet                                                   |                   | Patient included  | Patient excluded                                                                                     | Patient excluded                           |
| 20003 | 1140874712 | Diabinese                                                |                   | Patient included  | Patient excluded                                                                                     | Patient excluded                           |
| 20003 | 1140874716 | Glymese                                                  |                   | Patient included  | Patient excluded                                                                                     | Patient excluded                           |
| 20003 | 1140874724 | Daonil                                                   |                   | Patient included  | Patient excluded                                                                                     | Patient excluded                           |
| 20003 | 1140874726 | Semi-Daonil                                              |                   | Patient included  | Patient excluded                                                                                     | Patient excluded                           |
| 20003 | 1140874728 | Euglucon                                                 |                   | Patient included  | Patient excluded                                                                                     | Patient excluded                           |
| 20003 | 1140874732 | Malix                                                    |                   | Patient included  | Patient excluded                                                                                     | Patient excluded                           |
| 20003 | 1140874736 | Diabetamide                                              |                   | Patient included  | Patient excluded                                                                                     | Patient excluded                           |
| 20003 | 1140874740 | Calabren                                                 |                   | Patient included  | Patient excluded                                                                                     | Patient excluded                           |
| 20003 | 1140874746 | Diamicron                                                |                   | Patient included  | Patient excluded                                                                                     | Patient excluded                           |
| 20003 | 1141171652 | Actos                                                    |                   | Patient included  | Patient excluded                                                                                     | Patient excluded                           |
| 20003 | 1140868908 | Glucobay                                                 |                   | Patient included  | Patient excluded                                                                                     | Patient excluded                           |
| 20003 | 1141168668 | Novonorm                                                 |                   | Patient included  | Patient excluded                                                                                     | Patient excluded                           |
| 20003 | 1141157284 | Glipizide product                                        |                   | Patient included  | Patient excluded                                                                                     | Patient excluded                           |
| 30750 | HbA1c      | HbA1c greater than 48 mmol/mol is diagnosed as diabetes  |                   | Patient included  | Patient excluded                                                                                     | Patient excluded                           |

**Source data: Linkage to HES**

| ICD10 | Code | Description                             | Extra information | As binary outcome | As survival outcome (since birth date)                                               | As survival outcome (since enrolment date)                                                                                                                   |
|-------|------|-----------------------------------------|-------------------|-------------------|--------------------------------------------------------------------------------------|--------------------------------------------------------------------------------------------------------------------------------------------------------------|
| E11   |      | Non-insulin-dependent diabetes mellitus |                   | Patients included | Patient included, date of the event is the minimum between "epistart" and "admidate" | Patient included if the first event was after the UK Biobank recruitment date (Field 53), date of the event is the minimum between "epistart" and "admidate" |
| E110  |      | With coma                               |                   | Patients included | Patient included, date of the event is the minimum between "epistart" and "admidate" | Patient included if the first event was after the UK Biobank recruitment date (Field 53), date of the event is the minimum between "epistart" and "admidate" |
| E111  |      | With ketoacidosis                       |                   | Patients included | Patient included, date of the event is the minimum between "epistart" and "admidate" | Patient included if the first event was after the UK Biobank recruitment date (Field 53), date of the event is the minimum between "epistart" and "admidate" |
| E112  |      | With renal complications                |                   | Patients included | Patient included, date of the event is the minimum between "epistart" and "admidate" | Patient included if the first event was after the UK Biobank recruitment date (Field 53), date of the event is the minimum between "epistart" and "admidate" |
| E113  |      | With ophthalmic complications           |                   | Patients included | Patient included, date of the event is the minimum between "epistart" and "admidate" | Patient included if the first event was after the UK Biobank recruitment date (Field 53), date of the event is the minimum between "epistart" and "admidate" |

[illegible]

[illegible]

[illegible]

[illegible]

[illegible]

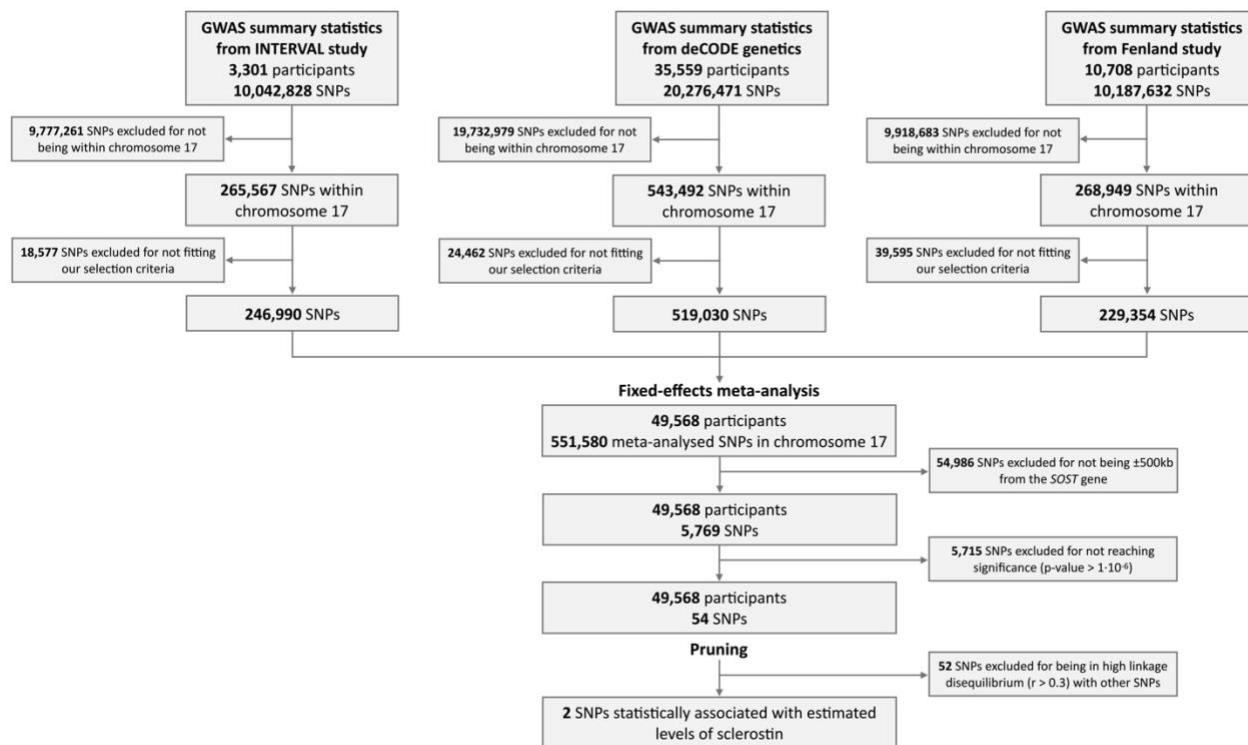

**Supplementary Fig. 1:** Flow chart of sclerostin meta-analysis and instrument selection.



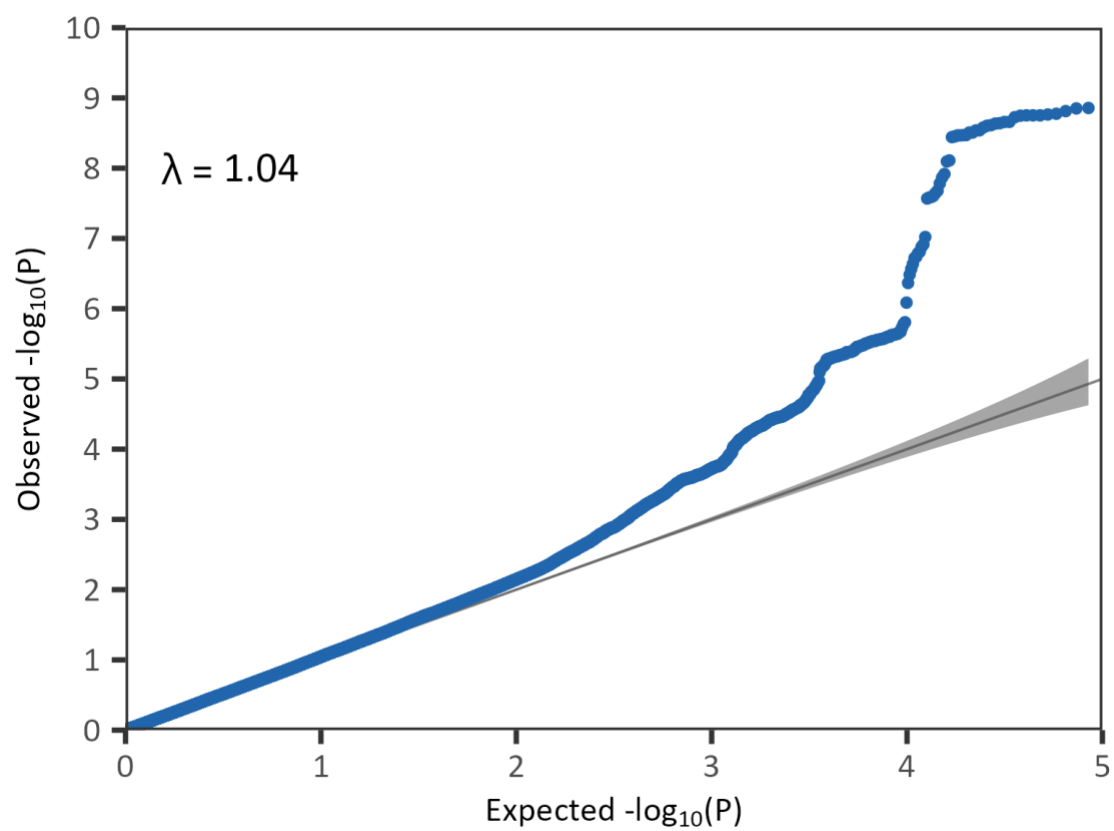

**Supplementary Fig. 2:** QQ plot of the fixed-effects meta-analysis results.

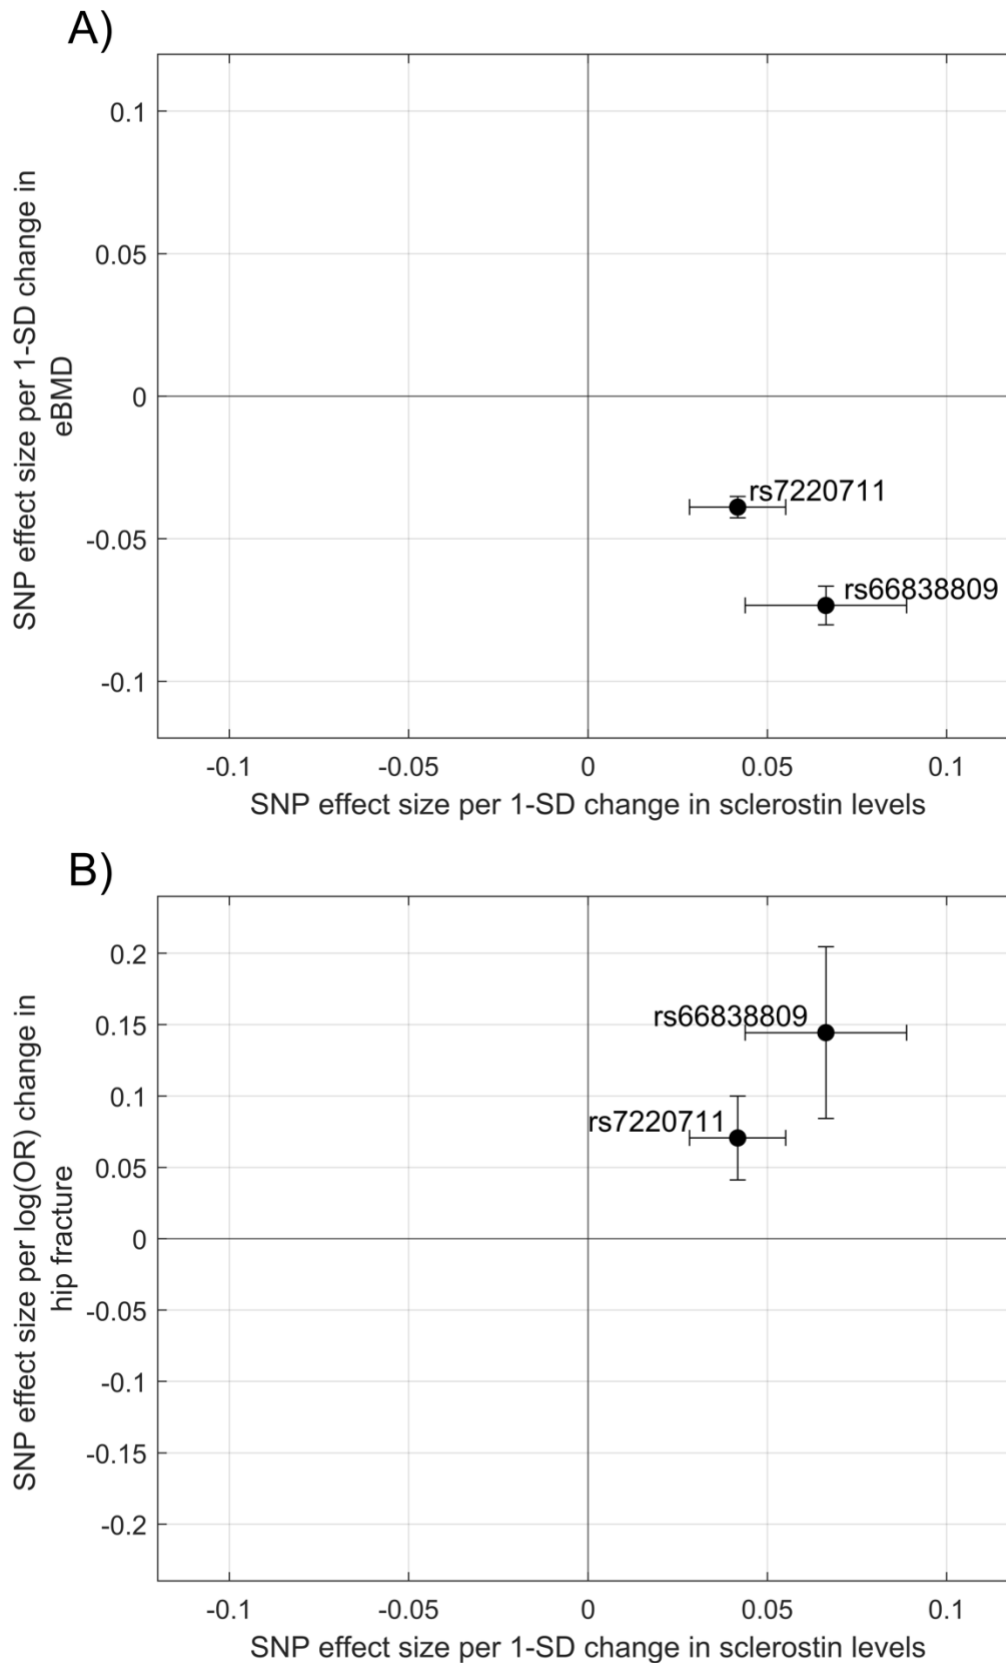

**Supplementary Fig. 3:** SNP effects on the positive control outcomes against SNP effects on the exposure. All SNPs with negative effects on the exposure are shown to be positive, with the sign of the effect on the outcome flipped. Error bars indicate the 95% confidence interval. **(A)** The vertical axis is the SNP effect size per 1-SD change in eBMD and, **(B)** the vertical axis is the SNP effect size for hip fracture.

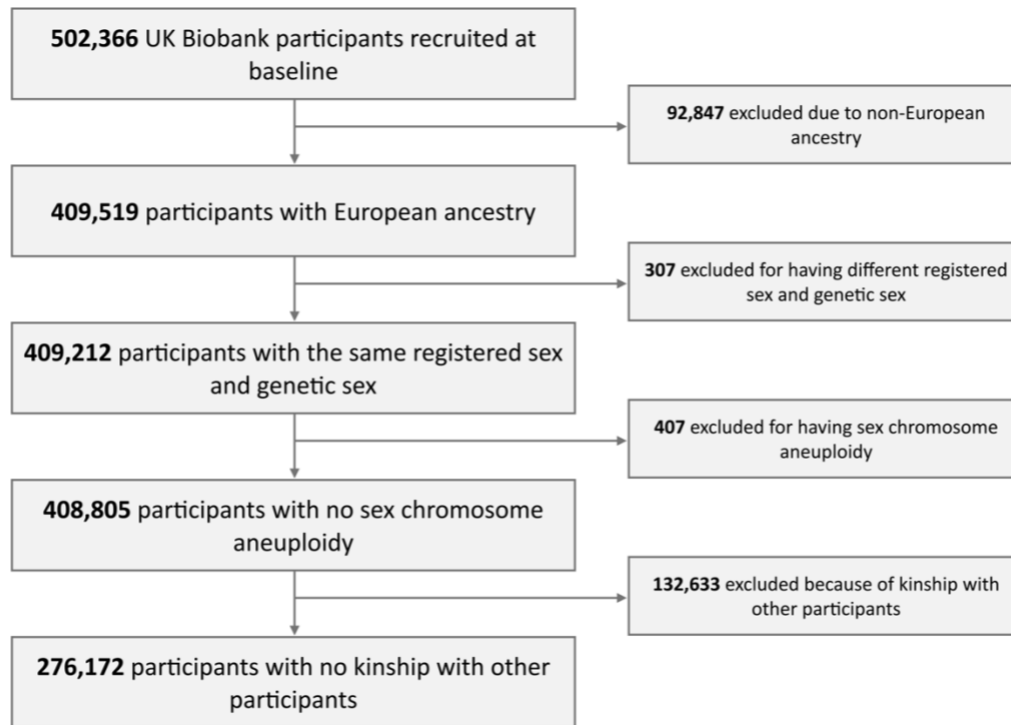

**Supplementary Fig 4:** Flow chart of the selection process of participants in the UK Biobank analysis.

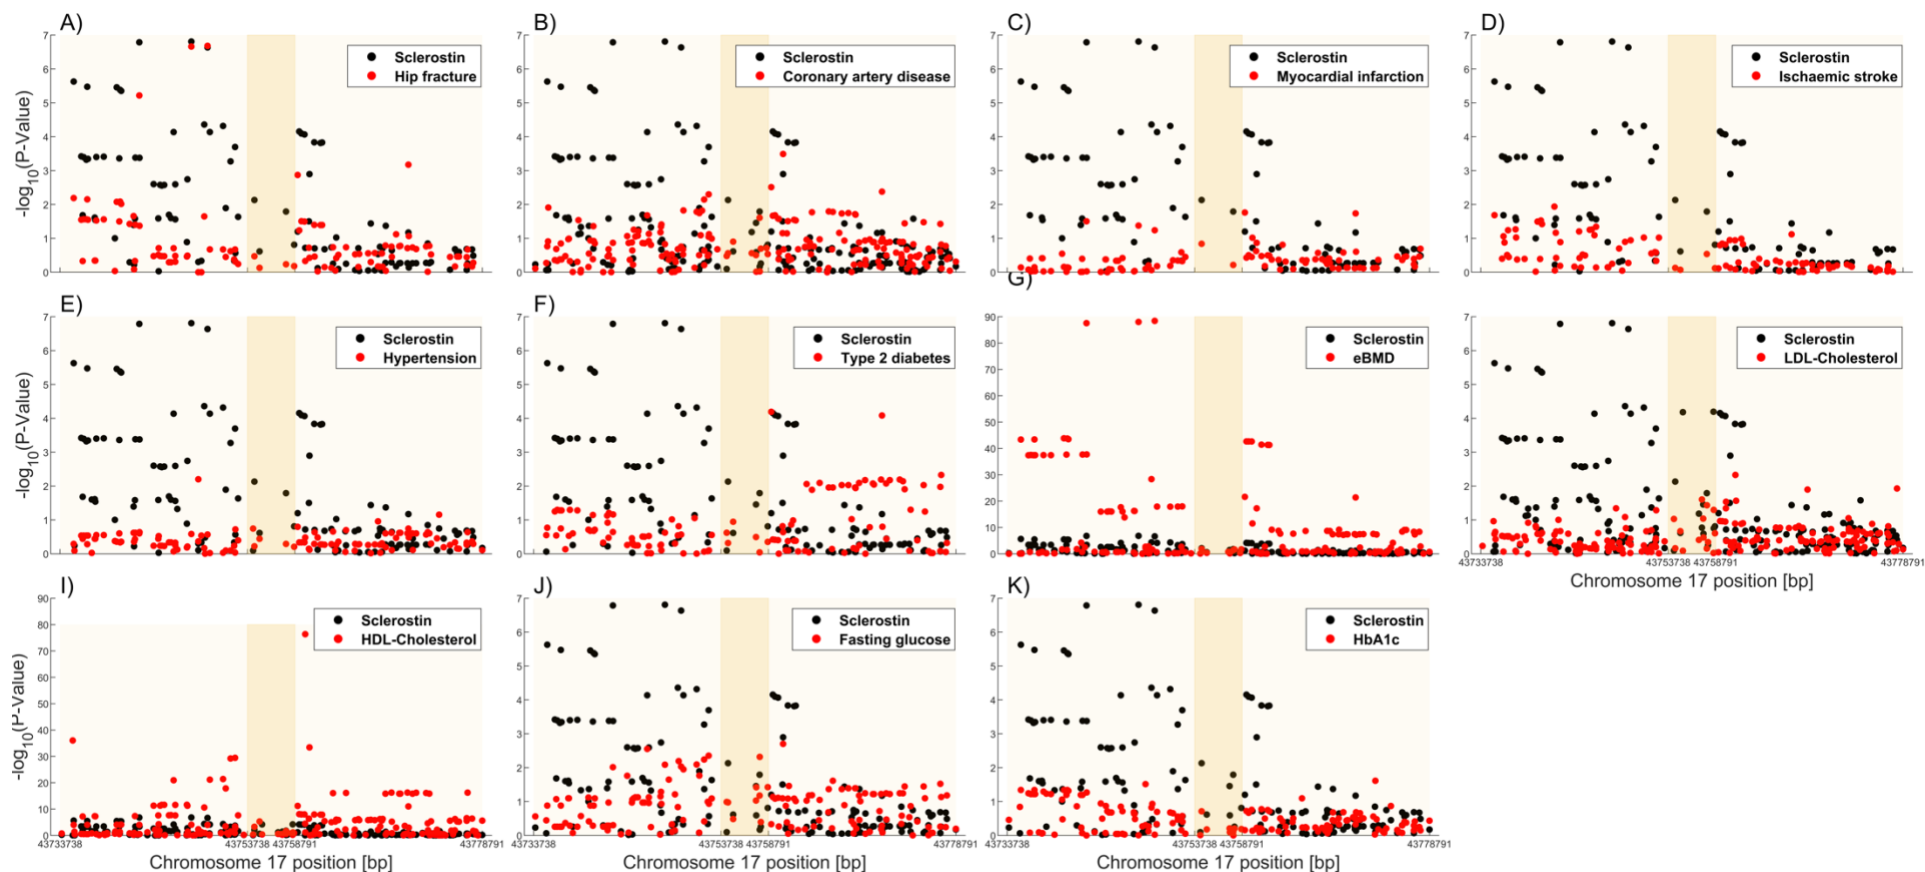

**Supplementary Fig. 5:** Colocalization analysis within  $\pm 20$ kb SOST gene. In dark yellow is the SOST gene. In light yellow is the area  $\pm 20$ kbp from the beginning and end of the SOST gene. **(A)** Regional plot for hip fracture, **(B)** Regional plot for coronary artery disease. **(C)** Regional plot for myocardial infarction. **(D)** Regional plot for ischaemic stroke. **(E)** Regional plot for hypertension. **(F)** Regional plot for type II diabetes mellitus. **(G)** Regional plot for estimated heel bone mineral density (eBMD). **(H)** Regional plot for LDL Cholesterol. **(I)** Regional plot for HDL Cholesterol. **(J)** Regional plot for fasting glucose. **(K)** Regional plot for HbA1c.

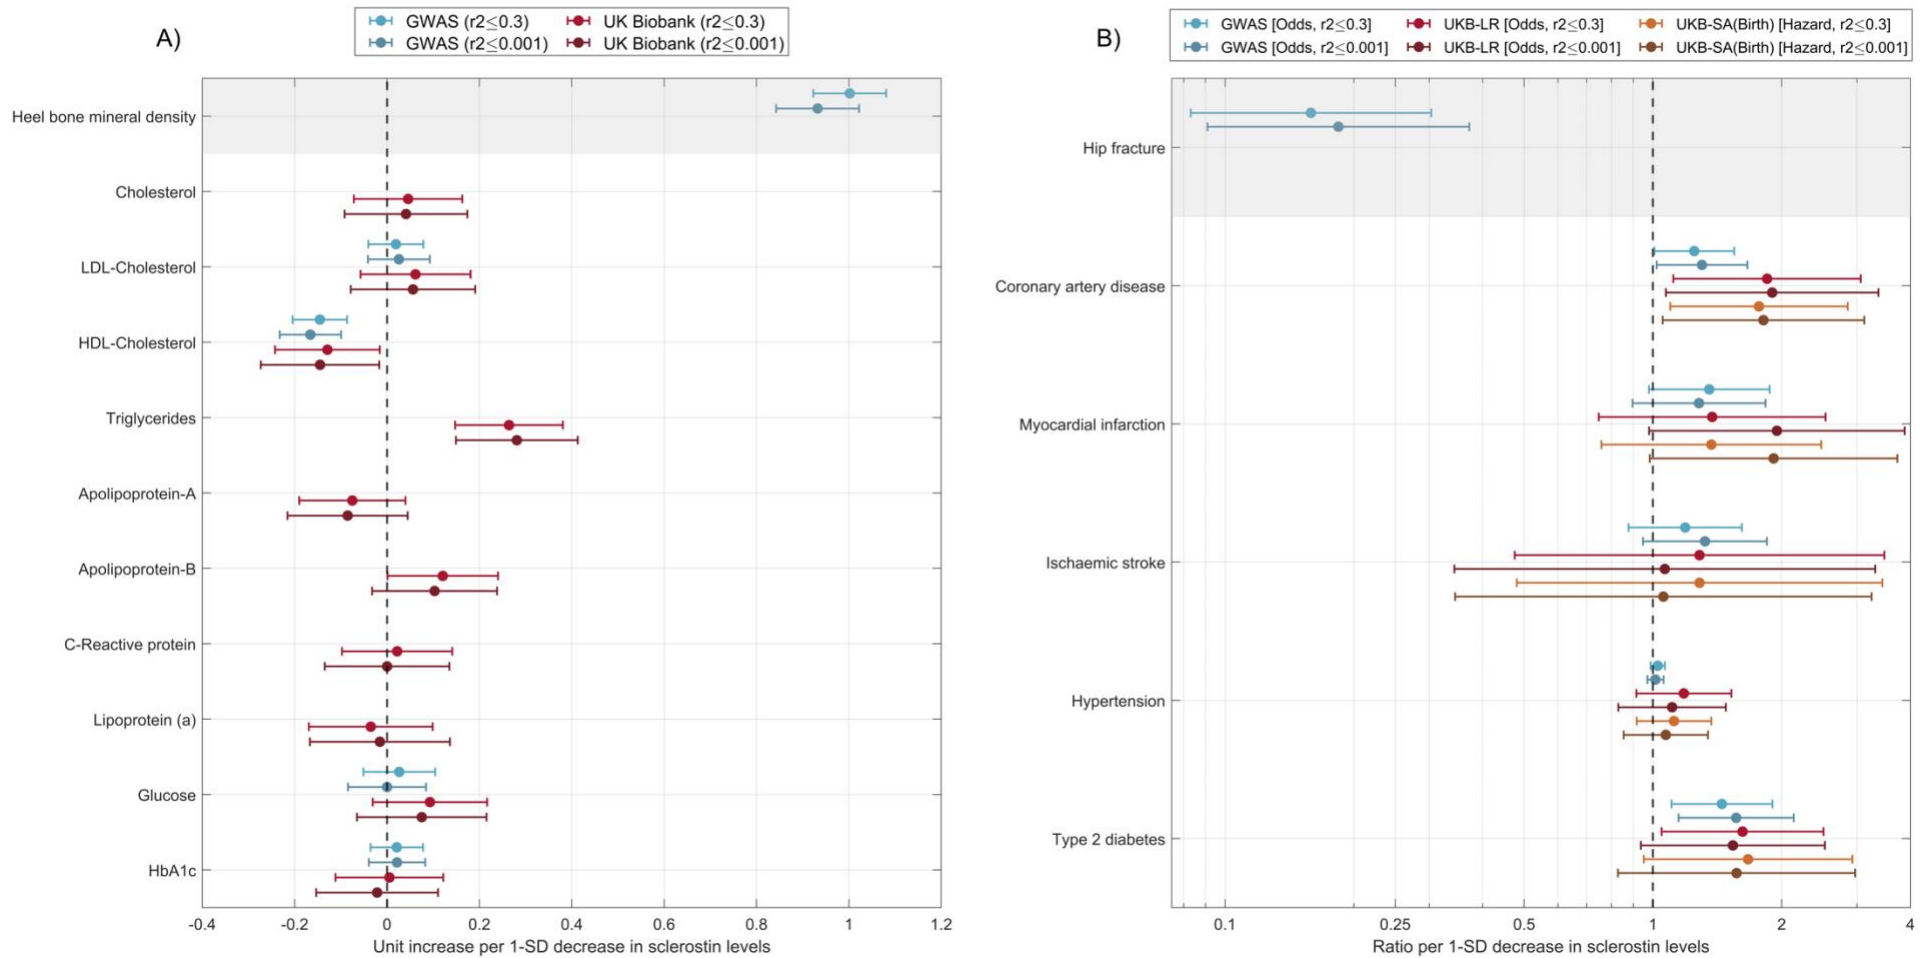

**Supplementary Fig. 6:** Stepwise pruning sensitivity analysis results using an  $r^2 \leq 0.001$ . Effect sizes were calculated using the Wald Ratio method. Results from the main analysis are represented using light colours, whereas those obtained using an  $r^2 \leq 0.001$  are shown using dark colours. Blue indicates the results using published GWAS summary statistics as the outcome; maroon the results obtained using a linear regression (for continuous outcomes) and logistic regression (for categorical outcomes) on the UK Biobank outcomes; and orange indicates the results using cox regression for UK Biobank survival outcomes. Error bars indicate the 95% confidence interval. **(A)** The horizontal axis shows the unit increase (95% CI) per 1 SD decrease in sclerostin levels. GWAS results for LDL and HDL-Cholesterol are in mg/dL, mmol/L for GWAS results of fasting glucose, % change for HbA1c and SD increase for the other outcomes. **(B)** The horizontal axis shows the odds/hazard ratio (95% CI) per 1 SD decrease in sclerostin levels. Note: UKB-LR = UK Biobank logistic regression, UKB-SA = UK Biobank survival analysis. Stepwise pruning sensitivity analysis results using an  $r^2 \leq 0.001$ .

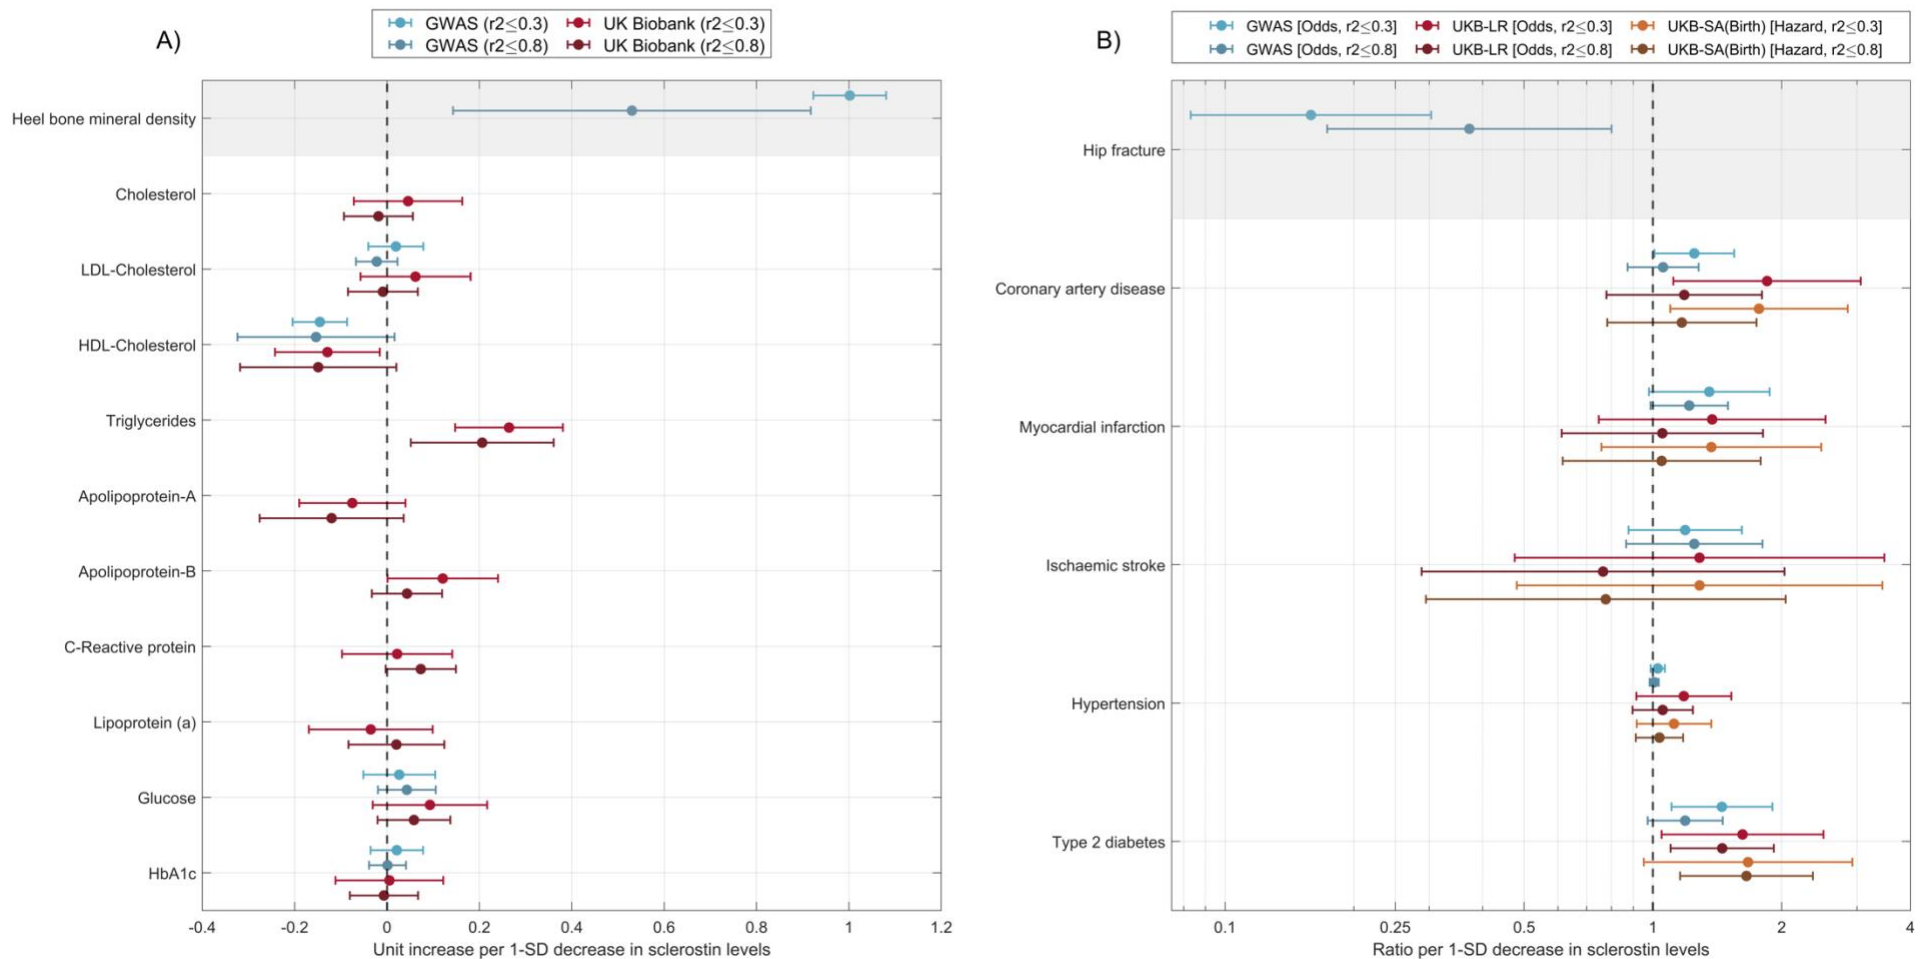

**Supplementary Fig. 7:** Stepwise pruning sensitivity analysis results using an  $r^2 \leq 0.8$ . Effect sizes were calculated using the generalised inverse variance weighted method. Results from the main analysis are represented using light colours, whereas those obtained using an  $r^2 \leq 0.8$  are shown using dark colours. Blue indicates the results using published GWAS summary statistics as the outcome; maroon the results obtained using a linear regression (for continuous outcomes) and logistic regression (for categorical outcomes) on the UK Biobank outcomes; and orange indicates the results using cox regression for UK Biobank survival outcomes. Error bars indicate the 95% confidence interval. **(A)** The horizontal axis shows the unit increase (95% CI) per 1 SD decrease in sclerostin levels. GWAS results for LDL and HDL-Cholesterol are in mg/dL, mmol/L for GWAS results of fasting glucose, % change for HbA1c and SD increase for the other outcomes. **(B)** The horizontal axis shows the odds/hazard ratio (95% CI) per 1 SD decrease in sclerostin levels. Note: UKB-LR = UK Biobank logistic regression, UKB-SA = UK Biobank survival analysis.

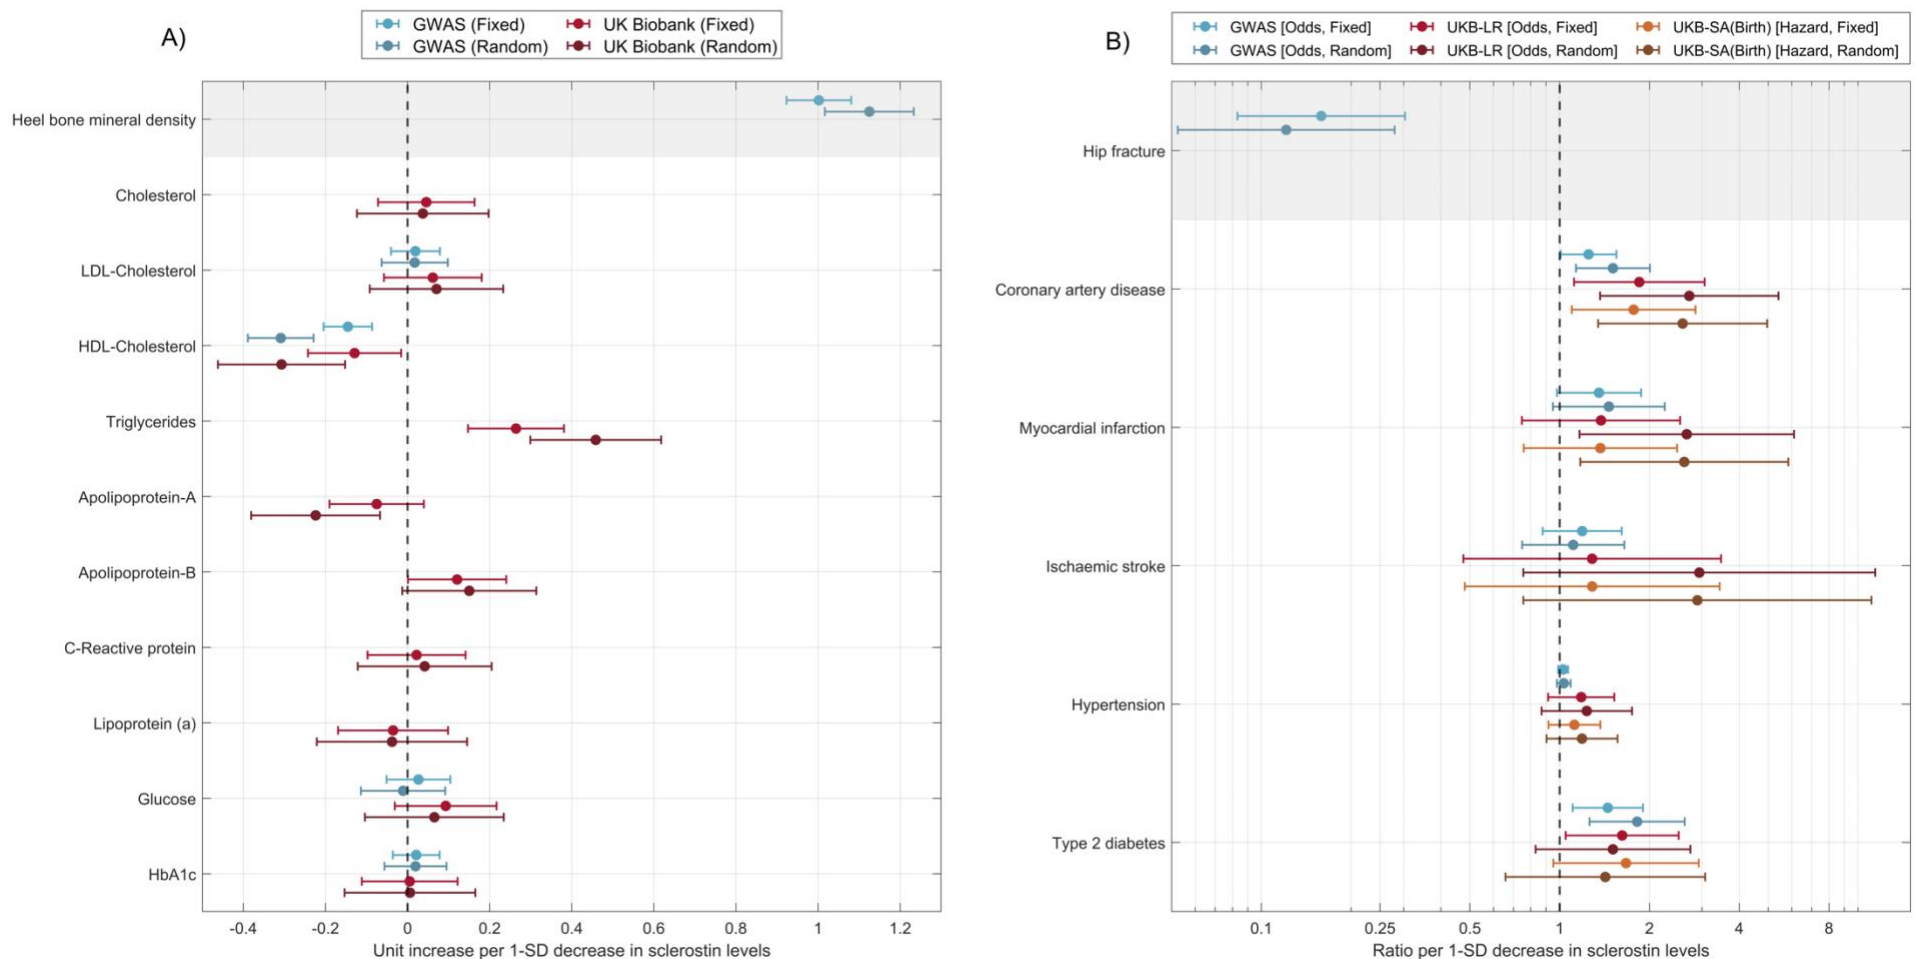

**Supplementary Fig. 8:** Random-effects sensitivity analysis results. Effect sizes were calculated using the generalised inverse variance weighted method. Results from the main analysis are represented using light colours, whereas random-effects results are shown using dark colours. Blue indicates the results using published GWAS summary statistics as the outcome; maroon the results obtained using a linear regression (for continuous outcomes) and logistic regression (for categorical outcomes) on the UK Biobank outcomes; and orange indicates the results using cox regression for UK Biobank survival outcomes. Error bars indicate the 95% confidence interval. **(A)** The horizontal axis shows the unit increase (95% CI) per 1 SD decrease in sclerostin levels. GWAS results for LDL and HDL-Cholesterol are in mg/dL, mmol/L for GWAS results of fasting glucose, % change for HbA1c and SD increase for the other outcomes. **(B)** The horizontal axis shows the odds/hazard ratio (95% CI) per 1 SD decrease in sclerostin levels. Note: UKB-LR = UK Biobank logistic regression, UKB-SA = UK Biobank survival analysis.

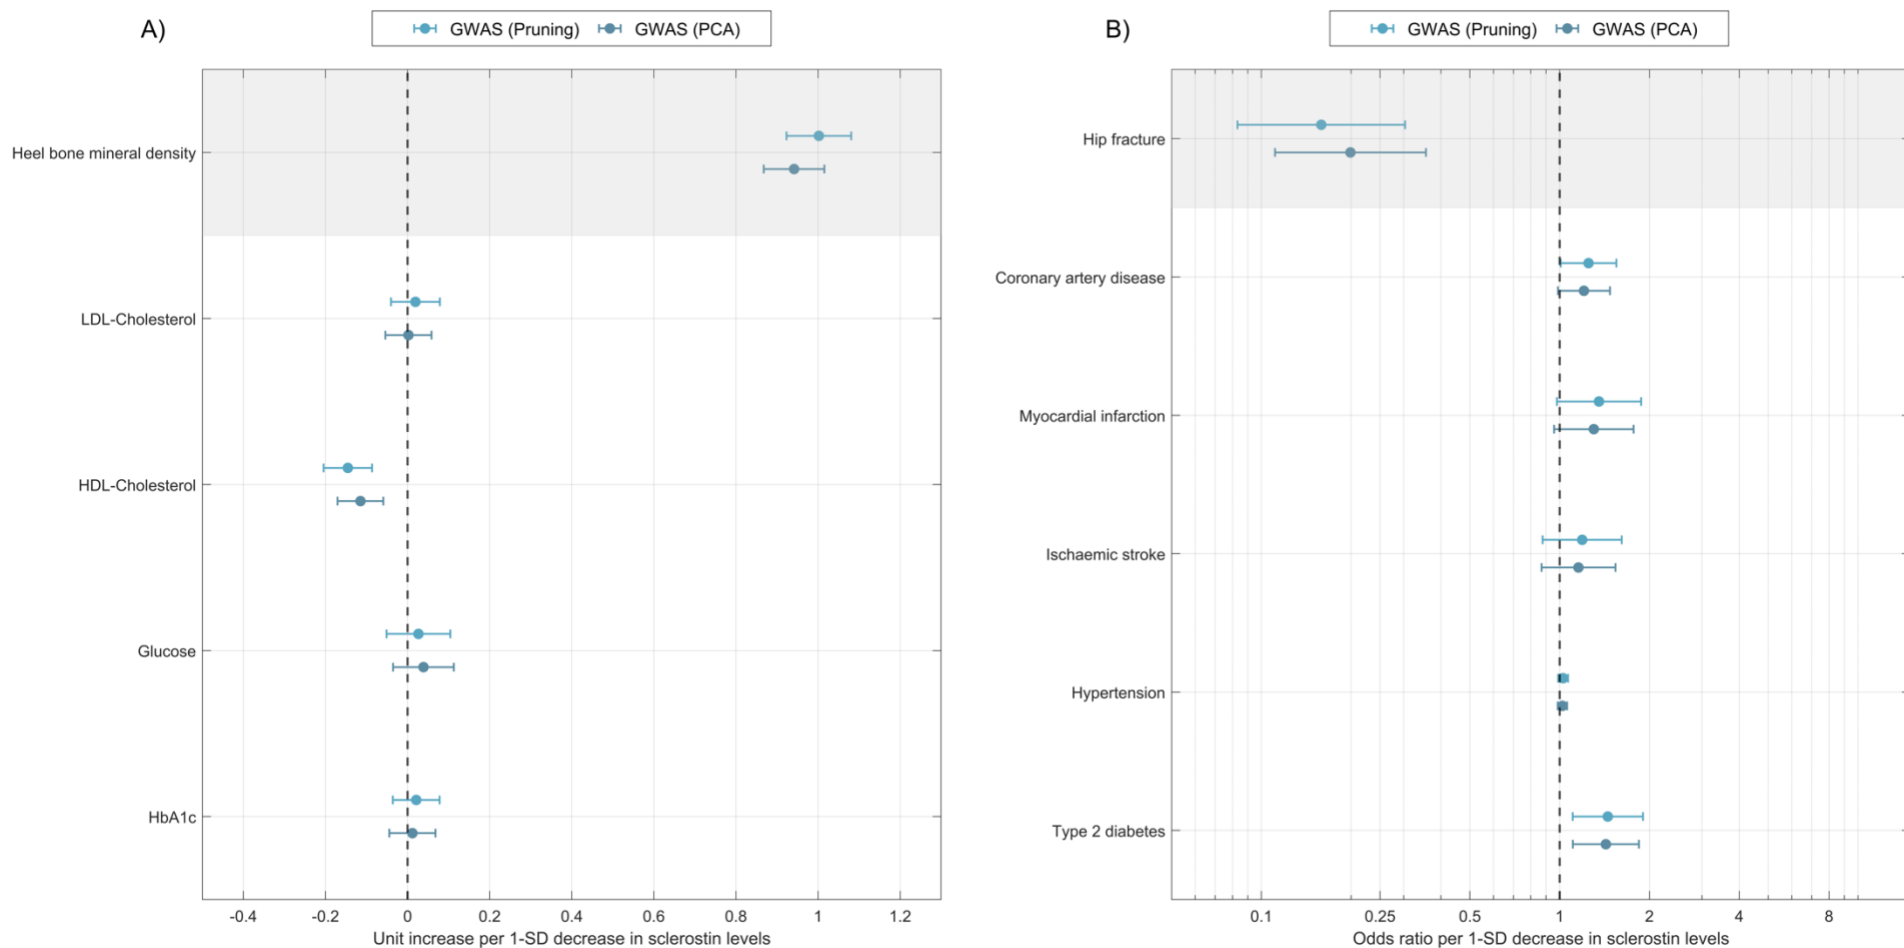

**Supplementary Fig. 9:** Principal components sensitivity analysis results. Results from the main analysis are shown using light colours, whereas principal components results are shown using dark colours. Error bars indicate the 95% confidence interval. **(A)** The horizontal axis shows the unit increase (95% CI) per 1 SD decrease in sclerostin levels. GWAS results for LDL and HDL-Cholesterol are in mg/dL, mmol/L for GWAS results of fasting glucose, % change for HbA1c and SD increase for the other outcomes. **(B)** The horizontal axis shows the odds/hazard ratio (95% CI) per 1 SD decrease in sclerostin levels. Note: UKB-LR = UK Biobank logistic regression, UKB-SA = UK Biobank survival analysis.



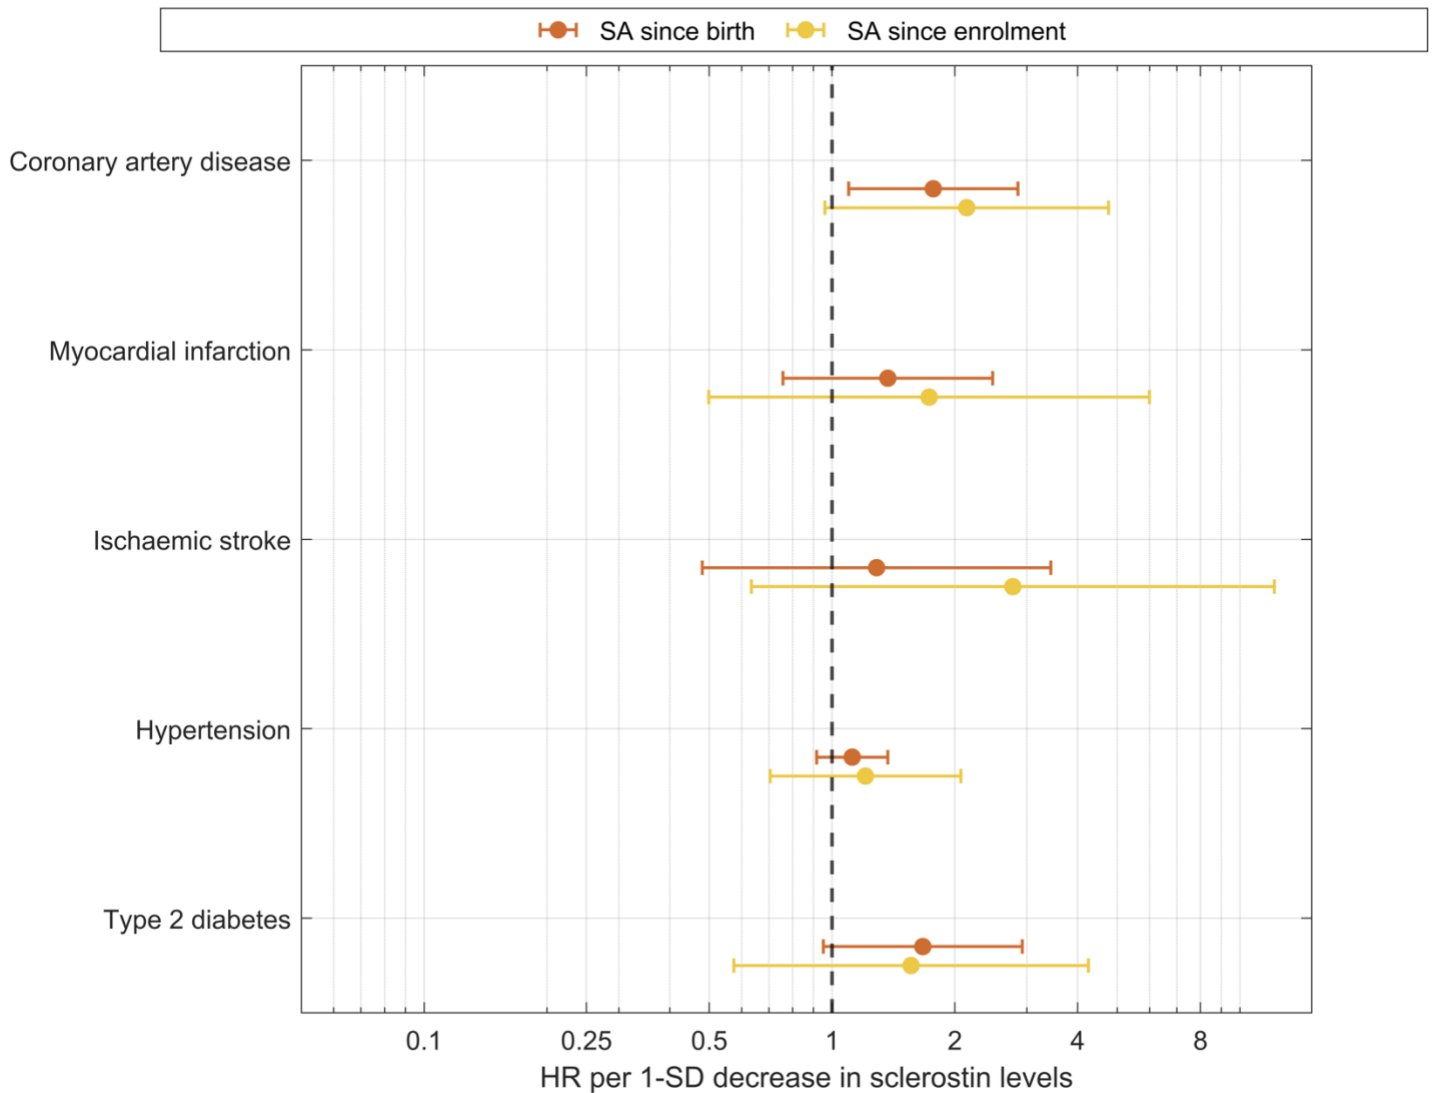

**Supplementary Fig. 10:** Survival analysis since UK Biobank enrolment sensitivity analysis results. Effect sizes were calculated using the generalised inverse variance weighted method. Main analysis results (survival outcomes since birth date) are shown in orange, whereas results from the sensitivity analysis (survival outcomes since UK Biobank enrolment) are shown in yellow. The horizontal axis shows the hazard ratio (HR) (95% CI) per 1 SD decrease in sclerostin levels. Error bars indicate the 95% confidence interval. Note: SA = Survival analysis.
